# Consequences of combining life-history traits with sex-specific differences

Vandana Revathi Venkateswaran<sup>1,\*</sup>, Olivia Roth<sup>2</sup> and Chaitanya S. Gokhale<sup>1</sup>

<sup>1</sup>Research Group for Theoretical Models of Eco-evolutionary Dynamics, Department of Evolutionary Theory, Max Planck Institute for Evolutionary Biology, August Thienemann Str. 2, 24306, Plön, Germany.

<sup>2</sup>Research Group for Parental Investment and Immune Dynamics, GEOMAR-Helmholtz Center for Ocean Research, Düsternbrookerweg 20, D-24105, Kiel, Germany.

\*Correspondence and request for materials should be addressed to [vandana@evolbio.mpg.de](mailto:vandana@evolbio.mpg.de)

Males and females evolved distinct life-history strategies, reflected in diverse life-history traits, summarized as sexual dimorphism. Life-history traits are highly interlinked. The sex that allocates more resources towards offspring is expected to increase its life span, and this might require an efficient immune system. However, the other sex might allocate its resources towards ornamentation, and this might have immunosuppressive effects. Activity of immune response may not be specific to the sex that produces the eggs but could correlate with the amount of parental investment given. Informed by experimental data, we designed a theoretical framework that combines multiple life-history traits. We disentangled sex-biased life-history strategies from a particular sex to include species with reversed sex-roles, and male parental investment. We computed the lifetime reproductive success from the fitness components arising from diverse sex-biased life-history traits, and observed a strong bias in adult sex ratio depending on sex-specific resource allocation towards life-history traits. Overall, our work provides a generalized method to combine various life-history traits with sex-specific differences to calculate the lifetime reproductive success. This was used to explain certain empirical observations as a consequence of sexual dimorphism in life-history traits.

**Keywords:** Life-history traits, theoretical biology, evolutionary game theory, population dynamics, lifetime reproductive success, adult sex ratio

## Introduction

Fitness is a complicated entity and describes the reproductive success of an individual reflecting the ability of individuals to produce offspring and survive. This arises from trade-offs between various

33 life-history traits. Theoretical models assessing the interaction of multiple life-history traits are  
34 thus crucial to understand organisms' overall life-history and how they impact fitness. Theoretical  
35 and experimental studies have shown how multiple life-history traits define an individual's lifetime  
36 reproductive success (Moore, 1990; Martin, 1992; Chapman and Partridge, 1996; Pusey et al., 1997;  
37 Fleming et al., 2000; Alonzo, 2002; Kalbe et al., 2009; Alonzo, 2010). However, typically, these  
38 traits have been studied in isolation.

39 In this study, we present a model that addresses the interaction of essential sex-specific life-history  
40 traits aiming to obtain the lifetime reproductive success of both sexes. This sheds light on how these  
41 traits are contributing to an individual's life-history. We further present the consequences of various  
42 sex-specific strategies affecting an evolving population.

43 Most life-history traits have sex-specific differences. Sex-specific life histories have evolved in  
44 the animal kingdom as a consequence of difference in gamete size known as anisogamy (Bell,  
45 1978); females contribute large costly eggs to reproduction and males small cheap sperm. The  
46 distinct resource allocation into the offspring asks for sex-specific life-history strategies (Trivers,  
47 1972; Hedrick and Temeles, 1989; Trivers, 2002; Austad, 2006; May, 2007; Roved et al., 2017). Here  
48 we focus on the sex-specific differences in three life history traits namely 1. Parental investment 2.  
49 Ornamentation and 3. Immunocompetence

50 In many species, parental investment is not restricted to sperm and egg production. Parental  
51 investment (PI) is any behavioural and physiological investment by a parent provided to the off-  
52 spring (Trivers, 1972, 2002). The sex that needs to allocate more resources towards the offspring  
53 strives for increased longevity since offspring survival also depends on the survival of the parent.  
54 Increased longevity requires the allocation of resources into parasite defence and, hence, immunity.  
55 Intense costly intrasexual competitions for obtaining mates are performed by allocating resources  
56 towards ornamentation (Hillgarth and Wingfield, 1997; Wong and Candolin, 2005; Andersson and  
57 Simmons, 2006). To this end, fewer resources may be available for the immune defence in the sex  
58 majorly investing in intrasexual interactions. This implies that both ornamentation and parental  
59 investment contribute to sexual immune dimorphism (Forbes, 2007; Nunn et al., 2008; Roth et al.,  
60 2011; Lin et al., 2016). Thus focusing only on one life-history trait in isolation will not shed light  
61 on the individual's true lifetime reproductive success.

62 We aimed for designing a framework in which multiple life-history traits and their interactions  
63 can be studied simultaneously. Particularly, we have constructed a holistic framework that captures  
64 sex-specific differences in parental investment, ornamentation and immune response and presents  
65 the outcomes of the overall life-history of a sex. We observed two important consequences of sex  
66 differences in life history interactions: 1) skewed adult sex ratios and 2) different ratios of homozygous  
67 and heterozygous individuals between the sexes with regard to immune alleles. We validated our  
68 findings using empirical data from a broad range of animal taxa and diverse life-history strategies to  
69 test the limits of our approach.

## 70 Model

71 We amalgamated approaches from standard population genetics and eco-evolutionary processes (Free-  
72 man and Herron, 2007; Otto and Day, 2007; Venkateswaran and Gokhale, 2019) (within and between  
73 populations) to investigate the interaction dynamics of multiple life-history traits (with sex-specific  
74 differences). We first developed a robust method (illustrated in Figure 1 to study the lifetime repro-  
75 ductive success (LRS) that arises from immune response, mating competition through ornaments  
76 and parental investment. Later, we used the LRS to investigate the consequences of combining the  
77 sex-specific interactions that are part of an individual's reproductive lifetime.

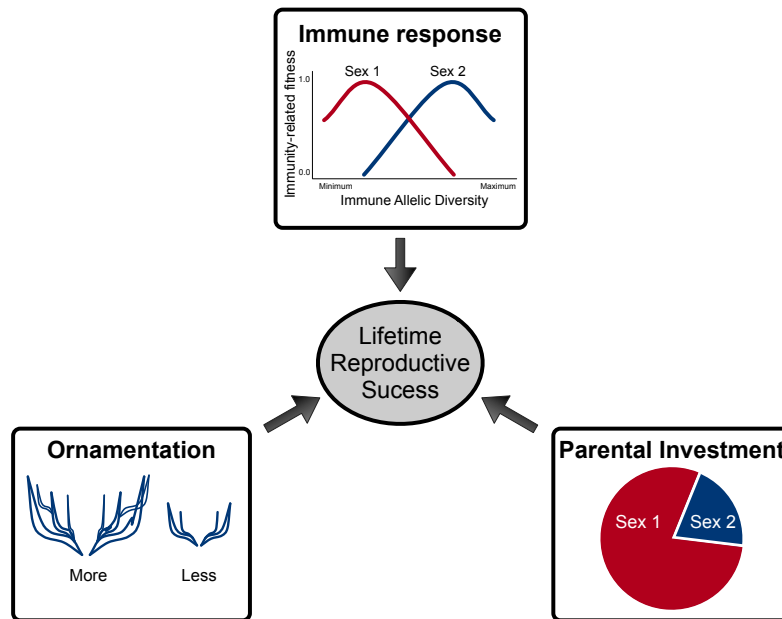

Figure 1: Model representation. Life-history traits affect the lifetime reproductive success. The fitness components from parental investment, immune system and ornamentation are offspring success, survival of the parent plus offspring and mating success, respectively. These contribute to an individual's lifetime reproductive success. We assumed that Sex 1 provides more parental investment (PI) than Sex 2. The sex-specific fitness from parental investment is modeled as frequency dependent since the number of copulations in one sex depends on the availability of the other sex. The individuals within a sex also have different levels of ornamentation, which they use to attract individuals of the other sex as potential mates. The model uses evolutionary game theory which gives frequency dependent fitnesses of two types of individuals: those with more and those with lesser levels of ornaments. The individuals also differ in their immune genotypes. Each immune genotype yields a certain immunity-related fitness value that depends on the type and number of different immune alleles. The strength of immune response differs between sexes (sexual immune dimorphism). We modeled the evolution of these immune genotypes using population dynamics. Finally, the fitness obtained from parental investment, ornamentation and immune response were used to measure the lifetime reproductive success of an individual.

78 Consider the two sexes in a population, Sex 1 denoted by a filled circle ●, and Sex 2 denoted by a  
 79 diamond ◇. We first consider one autosomal immunity locus  $A$  having two alleles  $A_1$  and  $A_2$ . The  
 80 three distinct zygotes genotypes would be  $A_1A_1$ ,  $A_1A_2$  and  $A_2A_2$ . For Sex 1, which throughout  
 81 this manuscript does major PI, the frequencies of the three genotypes are denoted by  $x_{\bullet 1}$ ,  $x_{\bullet 2}$ ,  $x_{\bullet 3}$ .  
 82 The fitnesses, of the same, are denoted by  $W_{\bullet 1}$ ,  $W_{\bullet 2}$  and  $W_{\bullet 3}$ . Similarly, we denote the frequencies  
 83 and fitnesses for Sex 2.

84 We used standard Mendelian segregation to model the evolution of the different types of individuals  
 85 in the population. The genotype dynamics following this segregation patterns are denoted in the  
 86 ESM. As with normal Mendelian segregation we assumed equal sex ratio; half of the offspring are  
 87 Sex 1 and the other half, Sex 2.

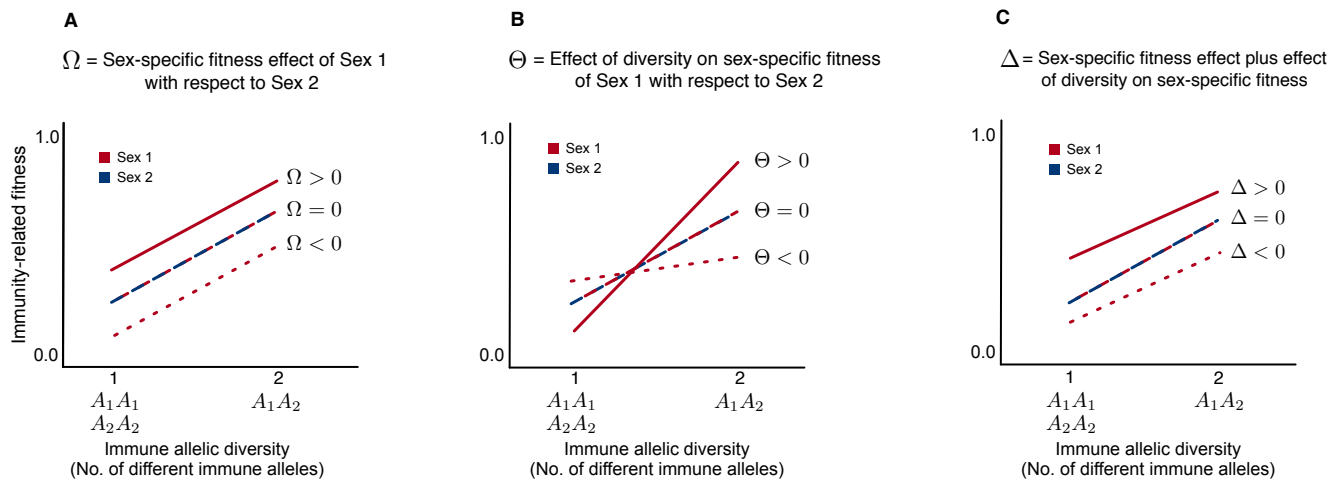

Figure 2: Schematic representation of different scenarios of sex-specific differences in host immunity-related fitness versus immune allelic diversity. We considered three distinct immune genotypes  $A_1A_1$ ,  $A_1A_2$ , and  $A_2A_2$  that result from mating between individuals having one immune gene locus  $A$  with two alleles  $A_1$  and  $A_2$  (Mendelian segregation, see ESM). Fitness positively correlates with the number of different alleles or allelic diversity (Apanius et al., 1997; Eizaguirre et al., 2009). So genotypes  $A_1A_1$  and  $A_2A_2$  (homozygotes) will have the same fitness value as they both have only one type of allele. But  $A_1A_2$  (heterozygote) which has two different types of alleles will have a higher fitness. This is known as heterozygous advantage and occurs within both sexes. However, between the sexes, there can be sex-specific differences (Roved et al., 2017). This is shown in panels (A), (B) and (C). In (A),  $\Omega > 0$  would imply that Sex 1 will have a higher value of immune response as compared to Sex 2 for any given allelic diversity. When  $\Omega < 0$ , Sex 1 has a lower values of immune response for any given allelic diversity as compared to Sex 2. Another situation is also possible: Sex 1 can have higher immune response for a homozygous locus, and lower immune response for a heterozygous locus when compared to Sex 2. This shown in (B), where  $\Theta$  is the difference between the angles of the two lines. In (C),  $\Delta$  differs from  $\Omega$  by considering lines that are not parallel to each other i.e. case C is a combination of cases A and B. When both sexes have the same immune response patterns,  $\Omega = \Theta = \Delta = 0$ .

## 88 Fitness

89 The lifetime reproductive success i.e. the overall fitness of an individual, is related to its immuno-  
 90 competence (the ability of an individual to produce a normal immune response following exposure  
 91 to a pathogen), and offspring success (Stoehr and Kokko, 2006; Kelly and Alonzo, 2010). Thus,  
 92 in our model the sex-specific fitness components resulting from immune response, ornamentation  
 93 and parental investment give the lifetime reproductive success of individuals of a sex as shown in  
 94 Figure 1. Below we introduce the fitness functions independently starting with immunity.

95 **Immune response.** A host's immunological diversity helps eliminate a large number of pathogens  
 96 and disease causing agents. However, in some cases, having too high diversity may reduce efficient  
 97 immune response e.g. auto-immune diseases triggered by high Major Histocompatibility Complex  
 98 (MHC) diversity. Thus, having an optimal number of alleles (intermediate diversity) has been shown  
 99 to be ideal in many systems (Nowak et al., 1992; Milinski, 2006; Woelfing et al., 2009). The host's  
 100 immunological diversity can be coarsely split up into three parts: low diversity ( $LD$ , low efficiency of  
 101 the immune system), intermediate or optimal diversity ( $ID$ , optimal immune efficiency), and high

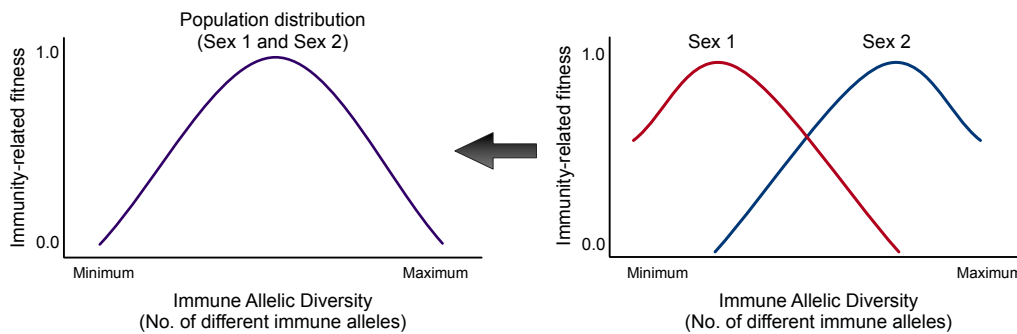

Figure 3: Schematic representation of host immunity-related fitness versus immune allelic diversity. For two immune gene loci  $A$  and  $B$  each having two alleles  $A_1, A_2$  and  $B_1, B_2$ , there would be ten distinct zygote genotypes. The population will comprise of individuals with these genotypes. Their immune responses would depend on these genotypes. The probability of immune response might reduce if the individual has too many immunity allele diversity. In the case of MHC, the auto-immune effect of having high MHC allele diversity reduces the probability of immune response (Nowak et al., 1992; Milinski, 2006; Woelfing et al., 2009). Thus there is an optimal allele diversity, which gives the parabolic shape to the curve. Recent studies have shown that males and females can have different optimal diversities ((Roved et al., 2017, 2018) and Winternitz et al., unpublished). Plotted here are hypothetical sex-specific optima of immune allelic diversity (Roved et al., 2017). The realized population distribution is what is typically looked at, but in our study we consider sex-specific optima of immune allelic diversity. Some immune genes may follow completely different sex-specific patterns from the one shown here (Roved et al., 2017; De Lisle, 2019), and this model can be used for most kinds of immune genes.

102 diversity ( $HD$ , might reduce the efficiency of the immune system). Recent experimental studies by  
 103 Roved et al. (2017, 2018) and Jamie Winternitz and Tobias Lenz (personal communication) show  
 104 that the optimal diversity could differ between the sexes. Based on these ideas, we have different  
 105 cases that are shown in the Figure 2 for one immune locus  $A$  with two alleles  $A_1$  and  $A_2$  that gives  
 106 three distinct parent and offspring genotypes  $A_1A_1$ ,  $A_1A_2$ , and  $A_2A_2$  denoted by  $j = \{1, 2, 3\}$ . We  
 107 denote their immune responses by  $W_{\bullet j}^I$  and  $W_{\diamond j}^I$  for genotypes  $j = \{1, 2, 3\}$  in the two sexes. In our  
 108 model, we refer to immune allelic diversity as the number of different immune alleles in the immune  
 109 loci. A non-linear immune allelic diversity profile shown in Figure 3 where the negative effect of  $HD$   
 110 is also addressed is considered later.

111 These approaches can be generalised to any genetic system controlling the immune response or  
 112 a completely different causal mechanism devoid of the genetic correlation. For example, the ef-  
 113 fect of nutrients and its effect of the immune system can be captured by a non-genetic model as  
 114 well (Chandra, 1983). Thus, while we focus on the genetic mechanism in the current model, we  
 115 stress that our framework is independent of the exact mechanism of how the immune response curves  
 116 develop. Condition of an individual is directly proportional to immune response (resources allocated  
 117 to self-maintenance, immune defense) which in turn determines the survivability (Stoehr and Kokko,  
 118 2006).

119 **Parental investment.** Both sexes pay the costs for initial PI, i.e. egg and sperm production  
 120 (Hayward and Gillooly, 2011). Pregnancy and parental care vary massively among species (Trivers,  
 121 1972; Wade and Shuster, 2002; Trivers, 2002; Kokko and Jennions, 2003; Alonzo, 2010) (Figure 1).  
 122 We assume that Sex 1 provides major PI (e.g. male sticklebacks, male pipefish, most female

123 mammals). The fitness from PI will depend on the relative abundance of the other sex and are given  
124 by,  $W_{\bullet}^P = (b^P - c_{\bullet}^P) \cdot \frac{x_{\diamond}}{x_{\bullet} + x_{\diamond}}$  and  $W_{\diamond}^P = (b^P - c_{\diamond}^P) \cdot \frac{x_{\bullet}}{x_{\bullet} + x_{\diamond}}$ . Here,  $b^P$  is the benefit (offspring produced)  
125 from PI while  $c_{\bullet}^P$  and  $c_{\diamond}^P$  are the costs for PI by Sex 1 and Sex 2, respectively. The frequency of Sex  
126 1 equals  $x_{\bullet} = x_{\bullet 1} + x_{\bullet 2} + x_{\bullet 3}$  and the frequency of individuals in Sex 2 equals  $x_{\diamond} = x_{\diamond 1} + x_{\diamond 2} + x_{\diamond 3}$ .  
127 Since we have assumed that Sex 1 provides maximum parental investment,  $c_{\diamond}^P < c_{\bullet}^P < b^P$ .

128 **Ornamentation** Mating competitions occur among individuals of the same sex to attract and obtain  
129 mates from the other sex. This is performed through fights, nuptial gifts, nests, sexual signals,  
130 ornament display and various types of 'attractiveness'. We refer to all of these as 'ornaments'.  
131 The investment into the display of ornaments will in most cases rise the chances of acquiring  
132 mates (Carranza et al., 1990; Petrie et al., 1991; Berglund et al., 1997; Wong and Candolin, 2005).  
133 However, ornamentation is often a costly signal (Zahavi, 1977; Andersson and Simmons, 2006;  
134 Milinski, 2006; Kurtz, 2007)). Individual assessment of immune responses helps defining the costs.

135 When Sex 2 participates in mating competition as shown in Figure 1, two types of Sex 2 individuals  
136 were considered in this interaction: one type displays more ornaments (*MO*) and the other type  
137 displays less ornaments (*LO*). Therefore Sex 2 consists of six types of individuals -  $x_{\diamond j, MO}$  and  
138  $x_{\diamond j, LO}$  where the genotype  $j = \{1, 2, 3\}$ . The frequency-dependent fitness that emerge from these  
139 interactions are written as  $W_{\diamond MO}^O$  and  $W_{\diamond LO}^O$  (see ESM for details).

## 140 Overall dynamics

141 The lifetime reproductive success is a multiplicative effect of the fitness arising from immune re-  
142 sponse, ornamentation and parental investment (Stoehr and Kokko, 2006; Kelly and Alonzo, 2010)  
143 as shown in the ESM. Using the LRS values in the Mendelian population dynamics, we can obtain the  
144 combined interaction dynamics of each type of individuals in the population (details and calculations  
145 in the ESM). The population is divided into nine types of individuals - the three genotypes ( $j$ ) of  
146 Sex 1,  $x_{\bullet j}$ , and the three genotypes of Sex 2 further split according to ornamentation into  $x_{\diamond j, MO}$   
147 and  $x_{\diamond j, LO}$ . We refer to them as simply  $x_i$  with  $i$  as the type of individual. The classical selection  
148 equation from population genetics (Crow and Kimura, 1970) gives the evolution of the frequency  
149  $x_i$  having average fitness  $W_i$  (Crow and Kimura, 1970; Schuster and Sigmund, 1983; Hofbauer and  
150 Sigmund, 1998; Gokhale et al., 2014). The equation can be written as,

$$\dot{x}_i = x_i(W_i - \bar{W}) \quad (1)$$

151 where  $\bar{W}$  is the average population fitness.

## 152 Results

### 153 Linear immune allelic diversity profile: single locus

154 The diversity levels in the immune alleles can result in differing immune response (e.g. MHC  
155 homozygotes and heterozygotes, are known to have different immune responses (Apanius et al.,  
156 1997; Ezzaguirre et al., 2009)). For one immune locus with two alleles, higher allele diversity boosts  
157 the immune response as shown Figure 2. The negative effect of very high diversity is not considered  
158 here. Besides the null model of no sexual conflict within the allele diversity, we also include different  
159 cases of sexual conflict (Roved et al., 2018) (Figure 2).

160 When we assume that both the sexes are not involved in mating competition i.e. ornamentation  
161 competition game is neutral; we can vary the cost of PI and the immune response curves (shown in  
162 Figure 2). The resulting equilibrium frequencies are shown in Figure 4. When the cost of PI is zero



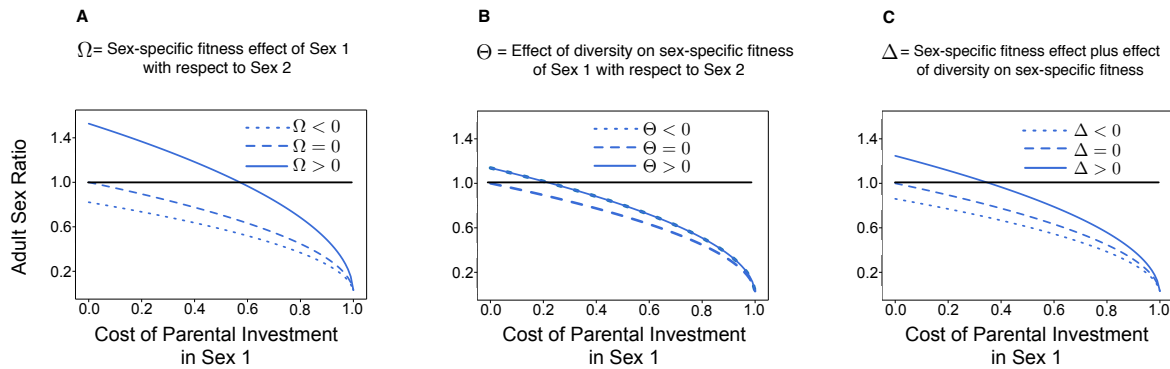

Figure 4: Adult sex ratio (Sex 1: Sex 2) for varying parental investment (PI) and various cases of sexual conflict within immune allelic diversity as shown in Figure 2. The ornamentation game is neutral, i.e. no selection acting on it (details in the ESM). As maintained throughout this study, Sex 1 does maximum PI. Sex 2 does negligible PI. Therefore, its cost is set to zero i.e.  $c_{\diamond}^P = 0$ . The black line highlights the even adult sex ratio i.e. 1:1. In (A), (B) and (C): When the cost of PI = 0 and there is no sex difference in immune response ( $\Omega = \Delta = \Theta = 0$ ), the obtained adult sex ratio is 1:1. In (A) and (C): when PI increases, the frequency of Sex 1 drops as PI is costly. When  $\Omega > 0$  and  $\Delta > 0$ , this sex difference in immune response compensates for the cost of PI. The fall in frequency of Sex 1 is lower than when  $\Omega = 0$  and  $\Delta = 0$  and Sex 1 has higher frequency than Sex 2 for most values of PI cost. However, when  $\Omega < 0$  and  $\Delta < 0$ , Sex 1's frequency decreases with an increase in PI. In (B): Frequency of Sex 1 is lower than Sex 2 for most values of PI cost for most  $\Theta$  values. Moreover,  $\Theta < 0$  and  $\Theta > 0$  give the same results. The above results highlight the fact that sexual conflict within immune allelic diversity can increase (when  $\Omega > 0$  and  $\Delta > 0$ ) or reduce (when  $\Omega < 0$ ,  $\delta < 0$ , almost all  $\Theta$ ) the adult sex ratio.

163 and there is no sex-biased difference in immune response, we observe that the sex ratio is 1 : 1. Here,  
 164 we focus on the adult sex ratio (ASR) (Kokko and Jennions, 2008). The classical definition of ASR  
 165 is number of males:total number of males and females, but in our Sex 1 could be male or female.  
 166 In this manuscript the term ASR is defined as the ratio between Sex 1 and Sex 2. Since in every  
 167 generation, offspring are produced in equal sex ratios (see ESM), what we obtain is the sex ratio of  
 168 the offspring after they become adults, perform mating interactions and parental investments. The  
 169 frequency of Sex 1 decreases with increasing PI. However, Sex 1 increases in frequency under certain  
 170 cases of sexual conflict over the immune allelic diversity (see  $\Delta > 0$ ,  $\Omega > 0$ , or  $\Theta \neq 0$  in Figure 2).  
 171 The results after including mating competitions are plotted in the figures in the ESM.

172 Under selection, the obtained genotypes deviated from the Hardy-Weinberg equilibrium (see Fig-  
 173 ures S.3, S.5 and S.4 of the ESM). One sex has a higher number of heterozygotes when compared  
 174 to the other sex. In this setup, the heterozygous immune genotype ( $A_1A_2$ ) has a higher immune  
 175 response than the homozygous genotypes  $A_1A_1$  and  $A_2A_2$  (Figure 3). Thus, an increase in heterozy-  
 176 gotes within one sex compared to the other would also mean that this sex has a higher mean activity  
 177 of the immune system. There are scenarios, such as a recent study with wild songbird populations,  
 178 where the number of heterozygotes and homozygotes even under selection turned out to be equal  
 179 between the sexes (Roved, 2019). However, this could just be the result of a particular immune  
 180 response profile, parental investment and ornamentation costs in that species. Different profiles of  
 181 sexual conflict within the immune allelic diversity would determine different ratios of homozygotes

182 and heterozygotes. More empirical studies with various model organisms would shed light on how  
 183 species show diverse ways of sexual conflict within the immune allelic diversity.

## 184 Nonlinear diversity profile

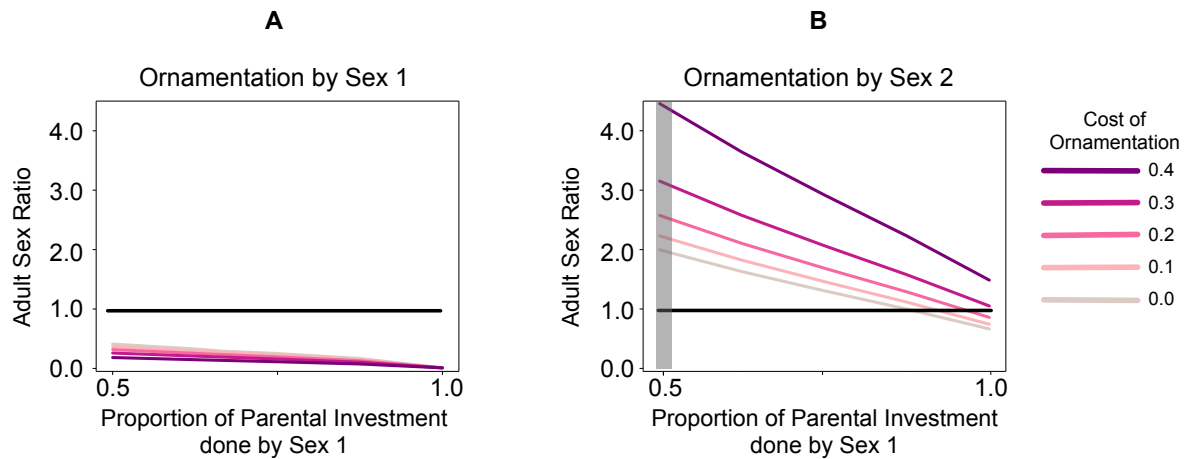

Figure 5: Qualitative difference in the adult sex ratio for diverse polygamous species with varying parental investment (PI) and ornamentation costs. As defined throughout the manuscript, Sex 1 is the major PI provider. For these calculations, we used the sexual conflict Case 4 shown in Figure 3. (A) Species such as sticklebacks where one sex performs both ornamentation and most PI. We observe that frequency of Sex 1 descends as its PI cost increases and this further decreases with a rise in its ornamentation cost. (B) The panel highlighted in gray shows bi-parental investment scenarios. In species where Sex 1 does most PI and Sex 2 performs elaborate mating competitions, the frequency of Sex 1 reduces with increasing PI. However, this value grows with ascending ornamentation cost in Sex 2. Note that for certain ornamentation and PI values, the adult sex ratios are equal. As shown by previous studies on multiple interactions between traits (Venkateswaran and Gokhale, 2019), even in the case where the cost of ornamentation is equal to zero in the mating competition game, the mere presence of that game will deviate the frequency of Sex 2 from a scenario where there is no ornamentation game.

185 In a multi-loci scenario, one can include non-linear density profiles (Nowak et al., 1992; Woelfing  
 186 et al., 2009) as shown in Figure 3. Across species, different sex-specific immune response profiles can  
 187 be found, depending on the sex-specific selection and phenotypic divergence (Uekert et al., 2006;  
 188 Love et al., 2008; Oertelt-Prigione, 2012). We hypothesis two such scenarios,

- 189 • the optimal diversity of immune alleles for both sexes is the same but the immune responses  
 190 at this optimal diversity could be different (for instance, females are more prone to acquiring  
 191 autoimmune diseases; sex hormones such as estrogen, testosterone also affect immune  
 192 response (Hillgarth and Wingfield, 1997; Törnwall et al., 1999; Whitacre, 2001) or,
- 193 • the two sexes have different optimal diversity of immune alleles and the immune response at  
 194 this optimal diversity is the same for both sexes. For instance, as shown in Roved et al. (2017,  
 195 2018), males and females have a different optimal diversity, where males need a higher number  
 196 of allele diversity to mount maximum immune response. We considered such a scenario for  
 197 this study (see Figure 3).



198 As done for the one locus scenario, we assume that only the number of different alleles i.e. allele  
199 diversity produces unequal fitness.

## 200 **Adult sex ratio in various species**

201 Our results showed that a sexual conflict within immune allelic diversity and varying parental invest-  
202 ment may result in adult sex ratio bias. The effect of ornamentation also plays an important role in  
203 skewing adult sex ratios as shown Figure 5. Diverse reproducing species have distinct ornamentation  
204 and parental investment costs. Figure 5 shows the values of adult sex ratios that our model predicts  
205 for a wide range of species.

## 206 **Discussion**

207 Various intersexual and intrasexual interactions during the reproductive lifespan of an individual  
208 determine its lifetime reproductive success (Stoehr and Kokko, 2006; Kalbe et al., 2009; Kelly  
209 and Alonzo, 2010). We have presented a model framework where several individual life-history  
210 interactions can be studied simultaneously. As shown in many empirical studies, the ASR has  
211 an impact on sex-specific differences and roles (Liker et al., 2013; Székely et al., 2014; Liker et al.,  
212 2015; Henshaw et al., 2019). Our results showed that the interaction of sex-specific life-history traits  
213 result in a biased adult sex ratio (ASR) (Pipoly et al., 2015). We showed that the vice versa is also  
214 possible (Kokko and Jennions, 2008) i.e., our results showed that ASR is a consequence of sex-specific  
215 differences. Our model incorporates the fact that fitness is a complex entity (Doebeli et al., 2017).  
216 The overall lifetime reproductive success is a combination of fitness values arising from the individual  
217 life-history strategies (here, parental investment, ornamentation and immunocompetence). This  
218 model showed that the variation in individuals' or the sex-specific lifetime reproductive success (based  
219 on their cost of parental investment, ornamentation and immune response levels) has population  
220 level consequences i.e. a skew in adult sex ratio (see Figures S.1 and S.2 in the ESM). Here, the  
221 females and males of one generation mate and produce equal numbers of daughters and sons in the  
222 next generation. Therefore, at birth, sex ratio of every generation was 1:1. The life-history traits are  
223 passed on from parents to offspring. Thus, even though every generation starts with equal sex ratio,  
224 their sex-specific traits change the adult sex ratio in every generation until it reaches an equilibrium  
225 state.

226 If a sex does both ornamentation and maximum parental investment, i.e. pays high costs of  
227 ornamentation and PI (eg. stickleback males), the ASR will be biased towards the sex that bears  
228 negligible costs for ornamentation and PI (e.g. female sticklebacks) (Hagen and Gilbertson, 1973)).  
229 Thus, the high costs for contributing to both PI and ornamentation cannot be compensated (Daly,  
230 1978) (Figure 5.A).

231 In birds and free-spawning fish both sexes exhibit similar levels of parental investment (equally  
232 little parental investment by both sexes in case of free-spawning fish) (Perrone Jr and Zaret, 1979;  
233 Gross and Sargent, 1985; Cockburn, 2006). Our model shows that these species could show equal  
234 ASR for certain parental investment and ornamentation levels (see Figure 5.B). However, in species  
235 where males have a higher ornamentation level, the ASR will be biased. For instance, free-spawning  
236 species such as the Atlantic salmon where males have elaborate ornaments, show a high adult sex  
237 ratio (7:1 ratio of males to females) (Mobley et al., 2019). Therefore, the high sex ratio values  
238 shown in the gray shaded region of Figure 5.B matches natural observations.

239 When one sex does maximum parental investment while the other displays ornaments, ASR is  
240 biased towards the sex that does more parental investment, as the other sex has to pay the costs  
241 of ornament display (Figure 5.B). Consider the pipefish species *N. ophidion* where males glue the

242 eggs on the belly and thus perform partial parental investment (Berglund et al., 1986). In contrast  
243 to pipefish species with placenta-like structure and an active transfer of nutrients and oxygen to the  
244 embryo (e.g. *S. typhle* (Berglund et al., 1986; Smith and Wootton, 1999)), *N. ophidion* only provide  
245 partial parental investment. We thus expect a decrease in frequency of *S. typhle* males compared  
246 to *N. ophidion* males (Berglund and Rosenqvist, 2003). However, with increasing ornamentation  
247 in females the frequency of males increases. Ornaments are costly as they make the bearer more  
248 vulnerable to predation. According to Bateman's principle (Bateman, 1948), the reproductive success  
249 of the sex that performs mating competition depends on the number of mating events. The sex  
250 limited by parental investment will have to live longer for more reproductive events to achieve  
251 the same reproductive success as the males (Roth et al., 2011). Thus sex differences in parental  
252 investment, ornamentation and immunity (Trivers, 1972; Hedrick and Temeles, 1989; Trivers, 2002;  
253 Roved et al., 2017) may also give rise to sexual differences in longevity, an important life-history  
254 trait (Austad, 2006; May, 2007).

255 Our model can be used to determine the lifetime reproductive success using fitness arising from  
256 sex-specific differences in life-history traits of a particular sex in a population e.g. parental invest-  
257 ment, ornamentation and immunocompetence. Studying the combined dynamics of life-history traits  
258 highlights population level consequences such as skewed adult sex ratio (Trivers, 2002; Kokko and  
259 Jennions, 2008) emerging due to sex-specific differences in life-history traits. With the aid of more  
260 empirical work directed towards investigating sexual conflict within the immune allelic diversity and  
261 other life-history strategies, we can obtain deeper understanding of the overall life-history of a sex or  
262 species. Disruptive selection leads to sexual dimorphism and in models that use tools like adaptive  
263 dynamics, traits that go through evolutionary branching may end up as two sex-specific traits i.e.  
264 sexual dimorphism. Recent studies addressed how coevolution of traits and resource competition  
265 drive the evolution of sexual dimorphism (Bolnick and Doebeli, 2003; Stoehr and Kokko, 2006;  
266 Vasconcelos and Rueffler, in press). Work by Vasconcelos and Rueffler (in press) demonstrated that  
267 even weak trade-offs between life-history traits can result in evolutionary branching that leads to  
268 evolution of two co-existing types. In this study, we investigated the eco-evolutionary consequences  
269 of interplay between two or more sex-specific life-history traits. Along with empirical evidence that  
270 matches our qualitative predictions, suggesting a skewed adult sex-ratio.

271 The functions in our model that describe fitness from parental investment and ornamentation  
272 consider polygamous species. While many sexually reproducing animals are polygamous, species  
273 like seahorses are monogamous throughout their lifetime (Vincent and Sadler, 1995). The trade-  
274 offs between ornamentation, parental investment and immunocompetence in monogamous species  
275 would be different. For instance, they may not have to bear costs of attracting mates after one  
276 brooding season. Our model can be modified to study the effect of integrating monogamous mating  
277 patterns. Also, with regard to immune genes such as the ones of the MHC, genetically dissimilar  
278 individuals mate more often as the evolutionary incentive is to produce optimal MHC diversity  
279 offspring (Milinski, 2006; Woelfing et al., 2009; Kalbe et al., 2009; Eizaguirre et al., 2009). To  
280 this end, mating is not random. Aspects of a model by Kirkpatrick (Kirkpatrick, 1982) for two  
281 autosomal loci with female mating preference for a trait that occurs in males is a potential extension  
282 of our model. Finally, novel studies directed at sexual conflict within the MHC and other immune  
283 genes as done by Roved et al. (2018) shall be very beneficial in providing further knowledge of how  
284 sex-specific immune defences manifest in different systems with distinct sex-specific ornamentation  
285 and parental investment patterns.

## 286 Electronic Supplementary material

### 287 S.1 One locus, two alleles

Let the fitnesses of the three genotypes be  $A_1A_1$ ,  $A_1A_2$  and  $A_2A_2$  are  $W_1$ ,  $W_2$  and  $W_3$ . The frequencies of the three genotypes are denoted by  $x_1$ ,  $x_2$  and  $x_3$ . Thus,

$$p(t+1) = x_1 + \frac{1}{2}x_2 = p(t)^2 \cdot \frac{W_1}{\bar{W}} + \frac{1}{2} \frac{2p(t)q(t) \cdot W_2}{\bar{W}}. \quad (\text{S.1})$$

Similarly,

$$q(t+1) = x_3 + \frac{1}{2}x_2 = q(t)^2 \cdot \frac{W_3}{\bar{W}} + \frac{1}{2} \frac{2p(t)q(t) \cdot W_2}{\bar{W}}. \quad (\text{S.2})$$

288 The  $W$ s could be survivability (viability) or fertility or both. Under neutrality they are all equal to  
289 unity (Otto and Day, 2007).

### 290 S.2 Separate population into males and females

291 If the population is separated into the two sexes, Sex 1 which could be male (or female) denoted by  
292 a solid circle symbol  $\bullet$ , and Sex 2 which could be female (or male) denoted by a diamond symbol  $\diamond$ .  
293 We stick to calling the sexes as Sex 1 and Sex 2 instead of males and females (and we also do not use  
294 the standard  $\text{♀}$  and  $\text{♂}$  symbols as it might be misleading) because we want to show a generalized  
295 idea of the dependence of sexual immune dimorphism on the amount of parental investment (or  
296 mating competition and other factors) given and not to the sex itself.

297 For Sex 1, let frequency of  $A_1A_1 = x_{\bullet 1}$ , frequency of  $A_1A_2 = x_{\bullet 2}$  and frequency of  $A_2A_2 = x_{\bullet 3}$ .  
298 Similarly, for Sex 2, let frequency of  $A_1A_1 = x_{\diamond 1}$ , frequency of  $A_1A_2 = x_{\diamond 2}$  and frequency of  
299  $A_2A_2 = x_{\diamond 3}$ .

300 In Sex 1, let the fitness of individuals with genotype  $A_1A_1 = W_{\bullet 1}$ , fitness of  $A_1A_2 = W_{\bullet 2}$   
301 and fitness of  $A_2A_2 = W_{\bullet 3}$ . Similarly, for Sex 2, let the fitness of individuals with genotype  
302  $A_1A_1 = W_{\diamond 1}$ , fitness of  $A_1A_2 = W_{\diamond 2}$  and fitness of  $A_2A_2 = W_{\diamond 3}$ . The sex that performs mating  
303 competitions (say, Sex 2) is further divided into individuals with Less or More Ornamentation (*LO*  
304 or *MO*). Through Mendelian population dynamics we obtain the of frequency of each genotype at  
305 subsequent generations (Gokhale et al., 2014),

$$\begin{aligned} \bar{W} x'_{\bullet 1} &= \frac{W_{\bullet 1}}{2} \left( x_{\bullet 1} x_{\diamond 1} + \frac{x_{\bullet 1} x_{\diamond 2}}{2} + \frac{x_{\bullet 2} x_{\diamond 1}}{2} + \frac{x_{\bullet 2} x_{\diamond 2}}{4} \right) \\ \bar{W} x'_{\bullet 2} &= \frac{W_{\bullet 2}}{2} \left( x_{\bullet 1} x_{\diamond 3} + x_{\bullet 3} x_{\diamond 1} + \frac{x_{\bullet 1} x_{\diamond 2}}{2} \right. \\ &\quad \left. + \frac{x_{\bullet 2} x_{\diamond 1}}{2} + \frac{x_{\bullet 3} x_{\diamond 2}}{2} + \frac{x_{\bullet 2} x_{\diamond 2}}{2} + \frac{x_{\bullet 2} x_{\diamond 3}}{2} \right) \\ \bar{W} x'_{\bullet 3} &= \frac{W_{\bullet 3}}{2} \left( x_{\bullet 3} x_{\diamond 3} + \frac{x_{\bullet 3} x_{\diamond 2}}{2} + \frac{x_{\bullet 2} x_{\diamond 3}}{2} + \frac{x_{\bullet 2} x_{\diamond 2}}{4} \right). \end{aligned} \quad (\text{S.3})$$

306 and

$$\begin{aligned}
 \bar{W} x'_{\diamond 1, MO} &= \frac{W_{\diamond 1, MO}}{2} \left( x_{\diamond 1, MO} x_{\bullet 1} + \frac{x_{\diamond 1, MO} x_{\bullet 2}}{2} + \frac{x_{\diamond 2, MO} x_{\bullet 1}}{2} + \frac{x_{\diamond 2, MO} x_{\bullet 2}}{4} \right) \\
 \bar{W} x'_{\diamond 2, MO} &= \frac{W_{\diamond 2, MO}}{2} \left( x_{\diamond 1, MO} x_{\bullet 3} + x_{\diamond 3, MO} x_{\bullet 1} + \frac{x_{\diamond 1, MO} x_{\bullet 2}}{2} \right. \\
 &\quad \left. + \frac{x_{\diamond 2, MO} x_{\bullet 1}}{2} + \frac{x_{\diamond 3, MO} x_{\bullet 2}}{2} + \frac{x_{\diamond 2, MO} x_{\bullet 2}}{2} + \frac{x_{\diamond 2, MO} x_{\bullet 3}}{2} \right) \\
 \bar{W} x'_{\diamond 3, MO} &= \frac{W_{\diamond 3, MO}}{2} \left( x_{\diamond 3, MO} x_{\bullet 3} + \frac{x_{\diamond 3, MO} x_{\bullet 2}}{2} + \frac{x_{\diamond 2, MO} x_{\bullet 3}}{2} + \frac{x_{\diamond 2, MO} x_{\bullet 2}}{4} \right) \quad (S.4) \\
 \bar{W} x'_{\diamond 1, LO} &= \frac{W_{\diamond 1, LO}}{2} \left( x_{\diamond 1, LO} x_{\bullet 1} + \frac{x_{\diamond 1, LO} x_{\bullet 2}}{2} + \frac{x_{\diamond 2, LO} x_{\bullet 1}}{2} + \frac{x_{\diamond 2, LO} x_{\bullet 2}}{4} \right) \\
 \bar{W} x'_{\diamond 2, LO} &= \frac{W_{\diamond 2, LO}}{2} \left( x_{\diamond 1, LO} x_{\bullet 3} + x_{\diamond 3, LO} x_{\bullet 1} + \frac{x_{\diamond 1, LO} x_{\bullet 2}}{2} \right) \\
 \bar{W} x'_{\diamond 3, LO} &= \frac{W_{\diamond 3, LO}}{2} \left( x_{\diamond 3, LO} x_{\bullet 3} + \frac{x_{\diamond 3, LO} x_{\bullet 2}}{2} + \frac{x_{\diamond 2, LO} x_{\bullet 3}}{2} + \frac{x_{\diamond 2, LO} x_{\bullet 2}}{4} \right)
 \end{aligned}$$

307 where  $\bar{W}$  is the average fitness of all genotypes. Also,  $x'_{\bullet i}$  and  $x'_{\diamond i}$  is the change in frequencies of  
 308 the genotypes  $i$  (for the different sexes) with time. Also, here we assume equal sex ratio; half of the  
 309 offspring are males and the other half, females.

310 Now, let  $W_{\diamond 1} = W_{\bullet 1} = W_1$ ,  $W_{\diamond 2} = W_{\bullet 2} = W_2$  and  $W_{\diamond 3} = W_{\bullet 3} = W_3$ . where  $W_{\diamond i} =$   
 311  $W_{\diamond i, MO} + W_{\diamond i, LO}$ . Then,

$$\begin{aligned}
 \bar{W} x'_1 &= \bar{W} x'_{\diamond 1} + \bar{W} x'_{\bullet 1} = W_1 \left[ (x_{\bullet 1} \cdot x_{\diamond 1}) + \frac{(x_{\bullet 1} \cdot x_{\diamond 2})}{2} + \frac{(x_{\bullet 2} \cdot x_{\diamond 1})}{2} + \frac{(x_{\bullet 2} \cdot x_{\diamond 2})}{4} \right] \\
 \bar{W} x'_2 &= \bar{W} x'_{\diamond 2} + \bar{W} x'_{\bullet 2} = W_2 \left[ (x_{\bullet 1} \cdot x_{\diamond 3}) + (x_{\bullet 3} \cdot x_{\diamond 1}) + \frac{(x_{\bullet 1} \cdot x_{\diamond 2})}{2} \frac{(x_{\bullet 2} \cdot x_{\diamond 1})}{2} \right. \\
 &\quad \left. + \frac{(x_{\bullet 3} \cdot x_{\diamond 2})}{2} + \frac{(x_{\bullet 2} \cdot x_{\diamond 2})}{2} + \frac{(x_{\bullet 2} \cdot x_{\diamond 3})}{2} \right] \quad (S.5) \\
 \bar{W} x'_3 &= \bar{W} x'_{\diamond 3} + \bar{W} x'_{\bullet 3} = W_3 \left[ (x_{\bullet 3} \cdot x_{\diamond 3}) + \frac{(x_{\bullet 3} \cdot x_{\diamond 2})}{2} + \frac{(x_{\bullet 2} \cdot x_{\diamond 3})}{2} + \frac{(x_{\bullet 2} \cdot x_{\diamond 2})}{4} \right].
 \end{aligned}$$

### 312 S.3 Mating competition

313 Mating competition is performed through fights, sexual signals, nuptial gifts, ornament display and  
 314 various types of attractiveness. We shall refer to all of these as 'ornaments'. Let's assume there are  
 315 individuals of two types in this interaction: ones that display more ornaments (MO) and ones that  
 316 display less (LO). Consider the mating competition interaction between individuals of Sex 2. For the  
 317 three different genotypes  $i$  the population in Sex 2 will consist of six different kinds of individuals,  
 318  $x_{\diamond j, MO}$  and  $x_{\diamond j, LO}$ .

319 We model this interaction as an evolutionary game (Maynard Smith, 1986; Sigmund and Nowak,  
 320 1999). The payoff matrix is written as,

$$\begin{array}{cc}
 & \begin{array}{cc} MO & LO \end{array} \\
 \begin{array}{c} \text{More Ornament or } MO \\ \text{Less Ornament or } LO \end{array} & \begin{pmatrix} \frac{b^O}{2} - c^O & b^O - c^O \\ 0 & \frac{b^O}{2} \end{pmatrix} \quad (S.6)
 \end{array}$$

321 where  $b^O$  is the benefit arising from mating competitions i.e. mating gain and  $c_{\diamond}^O$  is the cost  
 322 that Sex 2 bears to maintain ornament(s). The frequency dependent fitnesses resulting from these  
 323 interactions are given by,

$$W_{\diamond MO}^O = \left( \frac{b^O}{2} - c_{\diamond}^O \right) \frac{x_{\diamond,MO}}{x_{\diamond,MO} + x_{\diamond,LO}} + (b^O - c_{\diamond}^O) \frac{x_{\diamond,LO}}{x_{\diamond,MO} + x_{\diamond,LO}} \quad (S.7)$$

$$W_{\diamond LO}^O = 0 \frac{x_{\diamond,MO}}{x_{\diamond,MO} + x_{\diamond,LO}} + \frac{b^O}{2} \frac{x_{\diamond,LO}}{x_{\diamond,MO} + x_{\diamond,LO}}$$

324 where  $x_{\diamond,MO} = \sum_{j=1}^3 x_{\diamond j,MO}$  and  $x_{\diamond,LO} = \sum_{j=1}^3 x_{\diamond j,LO}$  and  $c^O < \frac{b_{\diamond}^O}{2}$ .  
 325 The payoff matrix (S.6) is an interaction between a pair of individuals i.e. two player game. We can  
 326 extend this to  $d$ -players (Gokhale and Traulsen, 2014; Chen et al., 2017) and the payoffs are given  
 327 by,

$$P_{MO} = \begin{cases} b^O - c_{\diamond}^O & k = 1 \\ \frac{b^O}{k} - c_{\diamond}^O & k > 1 \end{cases} \quad (S.8)$$

$$P_{LO} = \begin{cases} \frac{b^P}{n} & k = 0 \\ 0 & k > 0 \end{cases} \quad (S.9)$$

328 where  $k$  is the number of  $MO$  (More Ornament) players and  $n$  is the total number of players.  $k$   
 329 and  $n$  can vary between the sexes.

## 330 S.4 Dynamics

### 331 S.4.1 One locus

332 If we consider that Sex 1, the sex undergoes major parental investment does not involve in mating  
 333 competitions and individuals of Sex 2 perform mating competitions, then the population will have  
 334 nine types of individuals -  $x_{\bullet i}, x_{\diamond i,MO}$  and  $x_{\diamond i,LO}$  for the three genotypes  $i$ . We shall refer to them  
 335 as  $x_1, x_2, x_3, x_4, x_5, x_6, x_7, x_8$  and  $x_9$ .

336 The lifetime reproductive success of each type within a sex is a multiplicative combination of  
 337 mating gains, fertility and survival probability (Stoehr and Kokko, 2006; Kelly and Alonzo, 2010).  
 338 These are given by,

$$W_{\bullet 1} = \frac{W_{\bullet}^P}{1 - W_{\bullet 1}^I} \quad W_{\bullet 2} = \frac{W_{\bullet}^P}{1 - W_{\bullet 2}^I} \quad W_{\bullet 3} = \frac{W_{\bullet}^P}{1 - W_{\bullet 3}^I}$$

$$W_{\diamond 1,MO} = \frac{W_{\diamond}^P \cdot W_{\diamond MO}^O}{1 - W_{\bullet 1}^I} \quad W_{\diamond 2,MO} = \frac{W_{\diamond}^P \cdot W_{\diamond MO}^O}{1 - W_{\bullet 2}^I} \quad W_{\diamond 3,MO} = \frac{W_{\diamond}^P \cdot W_{\diamond MO}^O}{1 - W_{\bullet 3}^I} \quad (S.10)$$

$$W_{\diamond 1,LO} = \frac{W_{\diamond}^P \cdot W_{\diamond LO}^O}{1 - W_{\bullet 1}^I} \quad W_{\diamond 2,LO} = \frac{W_{\diamond}^P \cdot W_{\diamond LO}^O}{1 - W_{\bullet 2}^I} \quad W_{\diamond 3,LO} = \frac{W_{\diamond}^P \cdot W_{\diamond LO}^O}{1 - W_{\bullet 3}^I}.$$

339 Here,  $W_{\bullet i}^I$  and  $W_{\diamond i}^I$  are the fitness from immune responses (survivability) of type  $i$  for Sex 1 and  
 340 Sex 2 as described in the main text. Similarly,  $W_{\bullet}^P$  and  $W_{\diamond}^P$  are the fitness that arise from parental  
 341 investments performed by members of Sex 1 and Sex 2, respectively. The fitness from More and  
 342 Less ornamentation ( $W_{MO}^O$  and  $W_{LO}^O$  are as defined in the previous section. Using equations (S.3)  
 343 and (S.4), we can obtain the average fitnesses for each type of individuals in the population. For  
 344 Sex 1 they are given by,

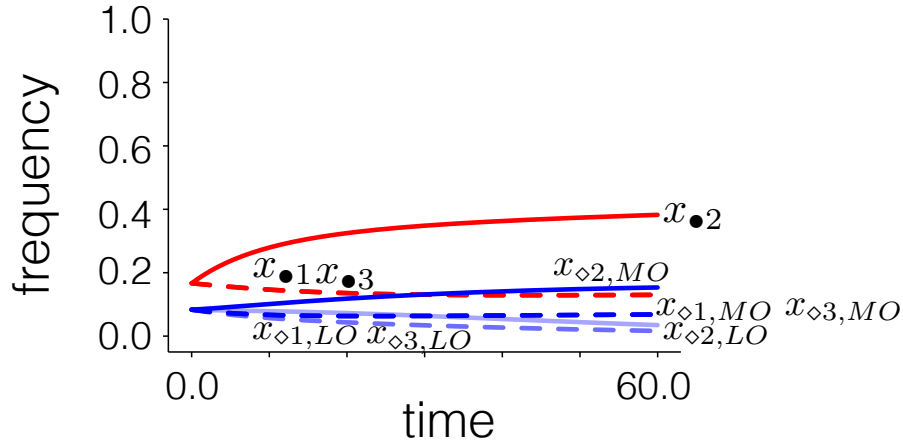

Figure S.1: **Evolution of frequency of all possible type of individuals in a population that exhibits sexual dimorphism in immunity and ornamentation, and sex difference in parental investment.** When sex 1 performs major parental investment and individuals of Sex 2 perform mating competitions, then the population will have nine types of individuals -  $x_{\bullet i}, x_{\diamond i,MO}$  and  $x_{\diamond i,LO}$  for the three immunity genotypes  $i$ . For the results shown in this figure,  $c_{\bullet}^P = 0.6$ ,  $c_{\diamond}^P = 0$  and  $c_{\diamond}^O = 0.4$ . Fitness from immune response comes from  $\Omega > 0$  of the linear immune allelic diversity vs immune response profile in Figure 2 in the main article. Red lines are for Sex 1 and blue for Sex 2. The solid lines are for the heterozygous genotype and dashed lines for the homozygotes. The lighter blue lines in Sex 2 are for individuals with low ornamentation.

$$W_{\bullet j} = \frac{\overline{W} x'_{\bullet j}}{x_{\bullet j}} \quad (\text{S.11})$$

345 where  $j = \{1, 2, 3\}$  and  $\overline{W}$  is the average fitness of all types. For Sex 2 they are given by,

$$\begin{aligned} W_{\diamond j,MO} &= \frac{\overline{W} x'_{\diamond j,MO}}{x_{\diamond j,MO}} \\ W_{\diamond j,LO} &= \frac{\overline{W} x'_{\diamond j,LO}}{x_{\diamond j,LO}} \end{aligned} \quad (\text{S.12})$$

346 where again  $j = \{1, 2, 3\}$ . Here, *MO* and *LO* correspond to individuals with more and less  
347 ornamentation, respectively. From equations (S.11) and (S.11) we know that there are nine different  
348 types of individuals whose frequencies can be just described by  $x_i$  for  $i = \{1, 2, 3, \dots, 9\}$  and their  
349 respective average fitnesses are denoted by  $W_i$  (for  $i = \{1, 2, 3, \dots, 9\}$ ).

350 Using the above given equations we have,

$$x'_i - x_i = \left( \frac{x_i W_i}{\overline{W}} \right) - x_i. \quad (\text{S.13})$$

351 The classical selection equation (Crow and Kimura, 1970; Hofbauer and Sigmund, 1998) that  
352 gives the evolution of each type (see Figure S.1) is then obtained by taking the time derivative of  
353 (S.13) given by,



$$\dot{x}_i = x_i(W_i - \bar{W}). \quad (\text{S.14})$$

354 The frequencies of all types reach an equilibrium value at some time point. This is our value of  
 355 interest that is used in the results throughout this ESM and the main article.

356 The frequencies of each sex is a summation of frequencies of all types of individuals in a sex.  
 357 Figure S.2 shows how the frequency of the sexes changes with sex-specific differences in immuno-  
 358 competence, parental investment, and ornamentation.

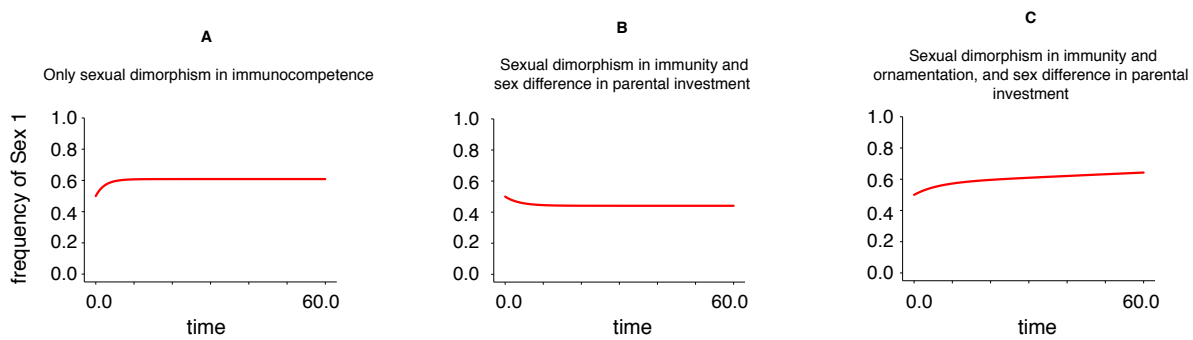

Figure S.2: **Evolution of frequency of Sex 1 in the population.** Since frequency of Sex 1 ( $x_{\bullet}$ ) and frequency of Sex 2 ( $x_{\diamond}$ ) equals unity,  $x_{\diamond}$  equals  $1 - x_{\bullet}$ . These frequencies are obtained by summing up all types of individuals within the sexes. (A) When Sex 1 has a higher values of immune response a compared to Sex 2 for all immune allelic diversity ( $\Omega$ ). (B) When condition A is met, but Sex 1 also performs parental investment, while Sex 2 does not. (C) When conditions A and B are met, and Sex 2 also exhibits ornamentation. The sex-specific traits evolve over generation (time) by selection and therefore, get passed on to subsequent generations (for example, case C is shown in Figure S.1). Therefore, even when the sex ratio is kept equal among offspring at every generation, their sex-specific characteristics change their frequency in the population.

### 359 S.4.2 One locus: Results

#### 360 Heterozygosity vs Homozygosity

361 Under Hardy Weinberg or when all interactions are neutral, the number of heterozygous and ho-  
 362 mozygous individuals within a sex would be equal. However, under selection (through different  
 363 probabilities of immune response for homozygotes and heterozygotes), varying cost of paren-  
 364 tal investment and ornamentation the number of heterozygotes and homozygotes would deviate from  
 365 neutrality. An increase in heterozygotes within one sex compared to the other, would also mean  
 366 than it has a higher immune response on average. When we allow for selection to act on all the three  
 367 factors (parental investment, immunity genes and ornamentation), we can observe their combined  
 368 effect on the increase in frequency of heterozygous individuals within a sex (results shown in Figures  
 369 S.3, S.4 and S.5).

## 370 S.5 Two loci having two alleles each

### 371 S.5.1 Population dynamics with separation of population into males and females

372 For Sex 1, let the frequency of  $A_1B_1|A_1B_1 = f_{\bullet}(A_1B_1|A_1B_1) = x_{\bullet 1}$ ,  $f_{\bullet}(A_1B_1|A_1B_2) = x_{\bullet 2}$ ,  
 373  $f_{\bullet}(A_1B_2|A_1B_2) = x_{\bullet 3}$ ,  $f_{\bullet}(A_1B_1|A_2B_1) = x_{\bullet 4}$ ,  $f_{\bullet}(A_1B_2|A_2B_1) = x_{\bullet 5}$ ,  $f_{\bullet}(A_1B_2|A_2B_2) = x_{\bullet 6}$ ,  
 374  $f_{\bullet}(A_2B_1|A_2B_1) = x_{\bullet 7}$ ,  $f_{\bullet}(A_2B_1|A_2B_2) = x_{\bullet 8}$ ,  $f_{\bullet}(A_2B_2|A_2B_2) = x_{\bullet 9}$  and  $f_{\bullet}(A_1B_1|A_2B_2) =$   
 375  $x_{\bullet 10}$ . Similarly, for Sex 2.

376 From Mendelian population dynamics (as done in the one locus case), the frequency of the  
 377 homozygotes in Sex 1 will be:

$$\begin{aligned} \bar{W}x'_{\bullet 1} = & \frac{W_1}{2} \left( x_{\bullet 1} \cdot x_{\circ 1} + \frac{x_{\bullet 1} \cdot x_{\circ 2} + x_{\bullet 1} \cdot x_{\circ 4} + x_{\bullet 1} \cdot x_{\circ 10} + x_{\bullet 2} \cdot x_{\circ 1} + x_{\bullet 4} \cdot x_{\circ 1} + x_{\bullet 10} \cdot x_{\circ 1}}{2} \right. \\ & \left. + \frac{x_{\bullet 2} \cdot x_{\circ 2} + x_{\bullet 2} \cdot x_{\circ 4} + x_{\bullet 2} \cdot x_{\circ 10} + x_{\bullet 4} \cdot x_{\circ 2} + x_{\bullet 4} \cdot x_{\circ 4} + x_{\bullet 4} \cdot x_{\circ 10} + x_{\bullet 10} \cdot x_{\circ 2} + x_{\bullet 10} \cdot x_{\circ 4} + x_{\bullet 10} \cdot x_{\circ 10}}{4} \right). \end{aligned} \quad (\text{S.15})$$

$$\begin{aligned} \bar{W}x'_{\bullet 3} = & \frac{W_3}{2} \left( x_{\bullet 3} \cdot x_{\circ 3} + \frac{x_{\bullet 2} \cdot x_{\circ 3} + x_{\bullet 3} \cdot x_{\circ 2} + x_{\bullet 3} \cdot x_{\circ 5} + x_{\bullet 3} \cdot x_{\circ 6} + x_{\bullet 5} \cdot x_{\circ 3} + x_{\bullet 6} \cdot x_{\circ 3}}{2} \right. \\ & \left. + \frac{x_{\bullet 2} \cdot x_{\circ 2} + x_{\bullet 2} \cdot x_{\circ 5} + x_{\bullet 2} \cdot x_{\circ 6} + x_{\bullet 5} \cdot x_{\circ 2} + x_{\bullet 5} \cdot x_{\circ 5} + x_{\bullet 5} \cdot x_{\circ 6} + x_{\bullet 6} \cdot x_{\circ 2} + x_{\bullet 6} \cdot x_{\circ 5} + x_{\bullet 6} \cdot x_{\circ 6}}{4} \right). \end{aligned} \quad (\text{S.16})$$

$$\begin{aligned} \bar{W}x'_{\bullet 7} = & \frac{W_7}{2} \left( x_{\bullet 7} \cdot x_{\circ 7} + \frac{x_{\bullet 4} \cdot x_{\circ 7} + x_{\bullet 5} \cdot x_{\circ 7} + x_{\bullet 7} \cdot x_{\circ 5} + x_{\bullet 7} \cdot x_{\circ 8} + x_{\bullet 8} \cdot x_{\circ 7}}{2} \right. \\ & \left. + \frac{x_{\bullet 4} \cdot x_{\circ 4} + x_{\bullet 4} \cdot x_{\circ 5} + x_{\bullet 4} \cdot x_{\circ 8} + x_{\bullet 5} \cdot x_{\circ 4} + x_{\bullet 5} \cdot x_{\circ 5} + x_{\bullet 5} \cdot x_{\circ 8} + x_{\bullet 8} \cdot x_{\circ 4} + x_{\bullet 8} \cdot x_{\circ 5} + x_{\bullet 8} \cdot x_{\circ 8}}{4} \right). \end{aligned} \quad (\text{S.17})$$

$$\begin{aligned} \bar{W}x'_{\bullet 9} = & \frac{W_9}{2} \left( x_{\bullet 9} \cdot x_{\circ 9} + \frac{x_{\bullet 6} \cdot x_{\circ 9} + x_{\bullet 8} \cdot x_{\circ 9} + x_{\bullet 9} \cdot x_{\circ 6} + x_{\bullet 9} \cdot x_{\circ 8} + x_{\bullet 9} \cdot x_{\circ 10} + x_{\bullet 10} \cdot x_{\circ 8}}{2} \right. \\ & \left. + \frac{x_{\bullet 6} \cdot x_{\circ 6} + x_{\bullet 6} \cdot x_{\circ 8} + x_{\bullet 10} \cdot x_{\circ 8} + x_{\bullet 8} \cdot x_{\circ 6} + x_{\bullet 8} \cdot x_{\circ 8} + x_{\bullet 8} \cdot x_{\circ 10} + x_{\bullet 10} \cdot x_{\circ 6} + x_{\bullet 10} \cdot x_{\circ 9} + x_{\bullet 10} \cdot x_{\circ 10}}{4} \right). \end{aligned} \quad (\text{S.18})$$

378 Frequency of the single heterozygotes will be:

$$\begin{aligned} \bar{W}x'_{\bullet 2} = & \frac{W_2}{2} \left( x_{\bullet 1} \cdot x_{\circ 3} + x_{\bullet 3} \cdot x_{\circ 1} + \frac{x_{\bullet 1} \cdot x_{\circ 2} + x_{\bullet 1} \cdot x_{\circ 5} + x_{\bullet 1} \cdot x_{\circ 6} + x_{\bullet 2} \cdot x_{\circ 1} + x_{\bullet 2} \cdot x_{\circ 2} + x_{\bullet 2} \cdot x_{\circ 3} + x_{\bullet 3} \cdot x_{\circ 2}}{2} \right. \\ & + \frac{x_{\bullet 3} \cdot x_{\circ 4} + x_{\bullet 3} \cdot x_{\circ 10} + x_{\bullet 4} \cdot x_{\circ 3} + x_{\bullet 5} \cdot x_{\circ 1} + x_{\bullet 5} \cdot x_{\circ 2} + x_{\bullet 6} \cdot x_{\circ 1} + x_{\bullet 10} \cdot x_{\circ 2}}{2} \\ & + \frac{x_{\bullet 2} \cdot x_{\circ 4} + x_{\bullet 2} \cdot x_{\circ 5} + x_{\bullet 2} \cdot x_{\circ 6} + x_{\bullet 2} \cdot x_{\circ 10} + x_{\bullet 4} \cdot x_{\circ 2} + x_{\bullet 4} \cdot x_{\circ 5} + x_{\bullet 4} \cdot x_{\circ 6} + x_{\bullet 5} \cdot x_{\circ 4} + x_{\bullet 5} \cdot x_{\circ 10}}{4} \\ & \left. + \frac{x_{\bullet 6} \cdot x_{\circ 2} + x_{\bullet 6} \cdot x_{\circ 4} + x_{\bullet 6} \cdot x_{\circ 10} + x_{\bullet 10} \cdot x_{\circ 2} + x_{\bullet 10} \cdot x_{\circ 5} + x_{\bullet 10} \cdot x_{\circ 6}}{4} \right). \end{aligned} \quad (\text{S.19})$$

$$\begin{aligned} \overline{W}x'_{\bullet 4} = & \frac{W_4}{2} \left( x_{\bullet 1} \cdot x_{\diamond 7} + x_{\bullet 7} \cdot x_{\diamond 1} + \frac{x_{\bullet 1} \cdot x_{\diamond 4} + x_{\bullet 1} \cdot x_{\diamond 5} + x_{\bullet 1} \cdot x_{\diamond 8} + x_{\bullet 4} \cdot x_{\diamond 1} + x_{\bullet 4} \cdot x_{\diamond 4} + x_{\bullet 4} \cdot x_{\diamond 7} + x_{\bullet 5} \cdot x_{\diamond 1}}{2} \right. \\ & + \frac{x_{\bullet 7} \cdot x_{\diamond 2} + x_{\bullet 7} \cdot x_{\diamond 4} + x_{\bullet 7} \cdot x_{\diamond 10} + x_{\bullet 8} \cdot x_{\diamond 1} + x_{\bullet 10} \cdot x_{\diamond 7} + x_{\bullet 10} \cdot x_{\diamond 8}}{2} \\ & + \frac{x_{\bullet 2} \cdot x_{\diamond 4} + x_{\bullet 2} \cdot x_{\diamond 5} + x_{\bullet 2} \cdot x_{\diamond 7} + x_{\bullet 2} \cdot x_{\diamond 8} + x_{\bullet 4} \cdot x_{\diamond 2} + x_{\bullet 4} \cdot x_{\diamond 5} + x_{\bullet 4} \cdot x_{\diamond 8} + x_{\bullet 4} \cdot x_{\diamond 10} + x_{\bullet 5} \cdot x_{\diamond 2} + x_{\bullet 5} \cdot x_{\diamond 4}}{4} \\ & \left. + \frac{x_{\bullet 5} \cdot x_{\diamond 10} + x_{\bullet 8} \cdot x_{\diamond 2} + x_{\bullet 8} \cdot x_{\diamond 4} + x_{\bullet 8} \cdot x_{\diamond 10} + x_{\bullet 10} \cdot x_{\diamond 4} + x_{\bullet 10} \cdot x_{\diamond 5}}{4} \right). \end{aligned} \quad (\text{S.20})$$

$$\begin{aligned} \overline{W}x'_{\bullet 6} = & \frac{W_6}{2} \left( x_{\bullet 9} \cdot x_{\diamond 3} + x_{\bullet 3} \cdot x_{\diamond 9} + \frac{x_{\bullet 2} \cdot x_{\diamond 9} + x_{\bullet 3} \cdot x_{\diamond 6} + x_{\bullet 3} \cdot x_{\diamond 8} + x_{\bullet 3} \cdot x_{\diamond 10} + x_{\bullet 5} \cdot x_{\diamond 9} + x_{\bullet 6} \cdot x_{\diamond 3} + x_{\bullet 6} \cdot x_{\diamond 6}}{2} \right. \\ & + \frac{x_{\bullet 6} \cdot x_{\diamond 9} + x_{\bullet 8} \cdot x_{\diamond 3} + x_{\bullet 9} \cdot x_{\diamond 2} + x_{\bullet 9} \cdot x_{\diamond 5} + x_{\bullet 9} \cdot x_{\diamond 6} + x_{\bullet 10} \cdot x_{\diamond 3}}{2} \\ & + \frac{x_{\bullet 2} \cdot x_{\diamond 6} + x_{\bullet 2} \cdot x_{\diamond 8} + x_{\bullet 2} \cdot x_{\diamond 10} + x_{\bullet 5} \cdot x_{\diamond 6} + x_{\bullet 5} \cdot x_{\diamond 8} + x_{\bullet 5} \cdot x_{\diamond 10} + x_{\bullet 6} \cdot x_{\diamond 2} + x_{\bullet 6} \cdot x_{\diamond 5} + x_{\bullet 6} \cdot x_{\diamond 8}}{4} \\ & \left. + \frac{x_{\bullet 6} \cdot x_{\diamond 10} + x_{\bullet 8} \cdot x_{\diamond 2} + x_{\bullet 8} \cdot x_{\diamond 5} + x_{\bullet 8} \cdot x_{\diamond 6} + x_{\bullet 10} \cdot x_{\diamond 2} + x_{\bullet 10} \cdot x_{\diamond 5} + x_{\bullet 10} \cdot x_{\diamond 6}}{4} \right). \end{aligned} \quad (\text{S.21})$$

$$\begin{aligned} \overline{W}x'_{\bullet 8} = & \frac{W_8}{2} \left( x_{\bullet 7} \cdot x_{\diamond 9} + x_{\bullet 9} \cdot x_{\diamond 7} + \frac{x_{\bullet 4} \cdot x_{\diamond 9} + x_{\bullet 5} \cdot x_{\diamond 9} + x_{\bullet 6} \cdot x_{\diamond 7} + x_{\bullet 7} \cdot x_{\diamond 6} + x_{\bullet 7} \cdot x_{\diamond 8} + x_{\bullet 7} \cdot x_{\diamond 10} + x_{\bullet 8} \cdot x_{\diamond 7}}{2} \right. \\ & + \frac{x_{\bullet 8} \cdot x_{\diamond 8} + x_{\bullet 8} \cdot x_{\diamond 9} + x_{\bullet 8} \cdot x_{\diamond 10} + x_{\bullet 9} \cdot x_{\diamond 4} + x_{\bullet 9} \cdot x_{\diamond 5} + x_{\bullet 9} \cdot x_{\diamond 8} + x_{\bullet 10} \cdot x_{\diamond 7}}{2} \\ & + \frac{x_{\bullet 4} \cdot x_{\diamond 6} + x_{\bullet 4} \cdot x_{\diamond 8} + x_{\bullet 4} \cdot x_{\diamond 10} + x_{\bullet 5} \cdot x_{\diamond 6} + x_{\bullet 5} \cdot x_{\diamond 8} + x_{\bullet 5} \cdot x_{\diamond 10} + x_{\bullet 6} \cdot x_{\diamond 4} + x_{\bullet 6} \cdot x_{\diamond 5} + x_{\bullet 6} \cdot x_{\diamond 8}}{4} \\ & \left. + \frac{x_{\bullet 8} \cdot x_{\diamond 4} + x_{\bullet 8} \cdot x_{\diamond 5} + x_{\bullet 8} \cdot x_{\diamond 6} + x_{\bullet 10} \cdot x_{\diamond 4} + x_{\bullet 10} \cdot x_{\diamond 5} + x_{\bullet 10} \cdot x_{\diamond 8}}{4} \right). \end{aligned} \quad (\text{S.22})$$

379 Frequency of the double heterozygotes will be:

$$\begin{aligned} \overline{W}x'_{\bullet 5} = & \frac{W_5}{2} \left( x_{\bullet 3} \cdot x_{\diamond 7} + x_{\bullet 7} \cdot x_{\diamond 3} + \frac{x_{\bullet 2} \cdot x_{\diamond 7} + x_{\bullet 3} \cdot x_{\diamond 4} + x_{\bullet 3} \cdot x_{\diamond 5} + x_{\bullet 3} \cdot x_{\diamond 8} + x_{\bullet 4} \cdot x_{\diamond 3} + x_{\bullet 5} \cdot x_{\diamond 3}}{2} \right. \\ & + \frac{x_{\bullet 5} \cdot x_{\diamond 5} + x_{\bullet 5} \cdot x_{\diamond 7} + x_{\bullet 6} \cdot x_{\diamond 5} + x_{\bullet 7} \cdot x_{\diamond 2} + x_{\bullet 7} \cdot x_{\diamond 5} + x_{\bullet 7} \cdot x_{\diamond 6} + x_{\bullet 8} \cdot x_{\diamond 3}}{2} \\ & + \frac{x_{\bullet 2} \cdot x_{\diamond 4} + x_{\bullet 2} \cdot x_{\diamond 5} + x_{\bullet 2} \cdot x_{\diamond 8} + x_{\bullet 4} \cdot x_{\diamond 2} + x_{\bullet 4} \cdot x_{\diamond 5} + x_{\bullet 4} \cdot x_{\diamond 6} + x_{\bullet 5} \cdot x_{\diamond 2} + x_{\bullet 5} \cdot x_{\diamond 4} + x_{\bullet 5} \cdot x_{\diamond 6}}{4} \\ & \left. + \frac{x_{\bullet 5} \cdot x_{\diamond 8} + x_{\bullet 6} \cdot x_{\diamond 4} + x_{\bullet 6} \cdot x_{\diamond 7} + x_{\bullet 6} \cdot x_{\diamond 8} + x_{\bullet 8} \cdot x_{\diamond 2} + x_{\bullet 8} \cdot x_{\diamond 5} + x_{\bullet 8} \cdot x_{\diamond 6}}{4} \right). \end{aligned} \quad (\text{S.23})$$

$$\begin{aligned}
 \overline{W}x'_{\bullet 10} = & \frac{W_{10}}{2} \left( x_{\bullet 1} \cdot x_{\diamond 9} + x_{\bullet 9} \cdot x_{\diamond 1} + \frac{x_{\bullet 1} \cdot x_{\diamond 6} + x_{\bullet 1} \cdot x_{\diamond 8} + x_{\bullet 1} \cdot x_{\diamond 10} + x_{\bullet 2} \cdot x_{\diamond 8} + x_{\bullet 4} \cdot x_{\diamond 8} + x_{\bullet 6} \cdot x_{\diamond 1} + x_{\bullet 8} \cdot x_{\diamond 1}}{2} \right. \\
 & + \frac{x_{\bullet 9} \cdot x_{\diamond 2} + x_{\bullet 9} \cdot x_{\diamond 4} + x_{\bullet 9} \cdot x_{\diamond 10} + x_{\bullet 10} \cdot x_{\diamond 1} + x_{\bullet 10} \cdot x_{\diamond 9} + x_{\bullet 10} \cdot x_{\diamond 10}}{2} \\
 & + \frac{x_{\bullet 2} \cdot x_{\diamond 6} + x_{\bullet 2} \cdot x_{\diamond 9} + x_{\bullet 2} \cdot x_{\diamond 10} + x_{\bullet 4} \cdot x_{\diamond 6} + x_{\bullet 4} \cdot x_{\diamond 9} + x_{\bullet 4} \cdot x_{\diamond 10} + x_{\bullet 6} \cdot x_{\diamond 2} + x_{\bullet 6} \cdot x_{\diamond 4}}{4} \\
 & \left. + \frac{x_{\bullet 6} \cdot x_{\diamond 10} + x_{\bullet 8} \cdot x_{\diamond 2} + x_{\bullet 8} \cdot x_{\diamond 4} + x_{\bullet 8} \cdot x_{\diamond 10} + x_{\bullet 10} \cdot x_{\diamond 2} + x_{\bullet 10} \cdot x_{\diamond 4} + x_{\bullet 10} \cdot x_{\diamond 6} + x_{\bullet 10} \cdot x_{\diamond 8}}{4} \right). \tag{S.24}
 \end{aligned}$$

380 Here, the  $W_i$ s are the fitnesses of each genotype  $i$  with frequency  $x_i$  and  $\overline{W}$  is their mean fitness.

381 Similarly, we can obtain the frequencies of the genotypes in Sex 2.

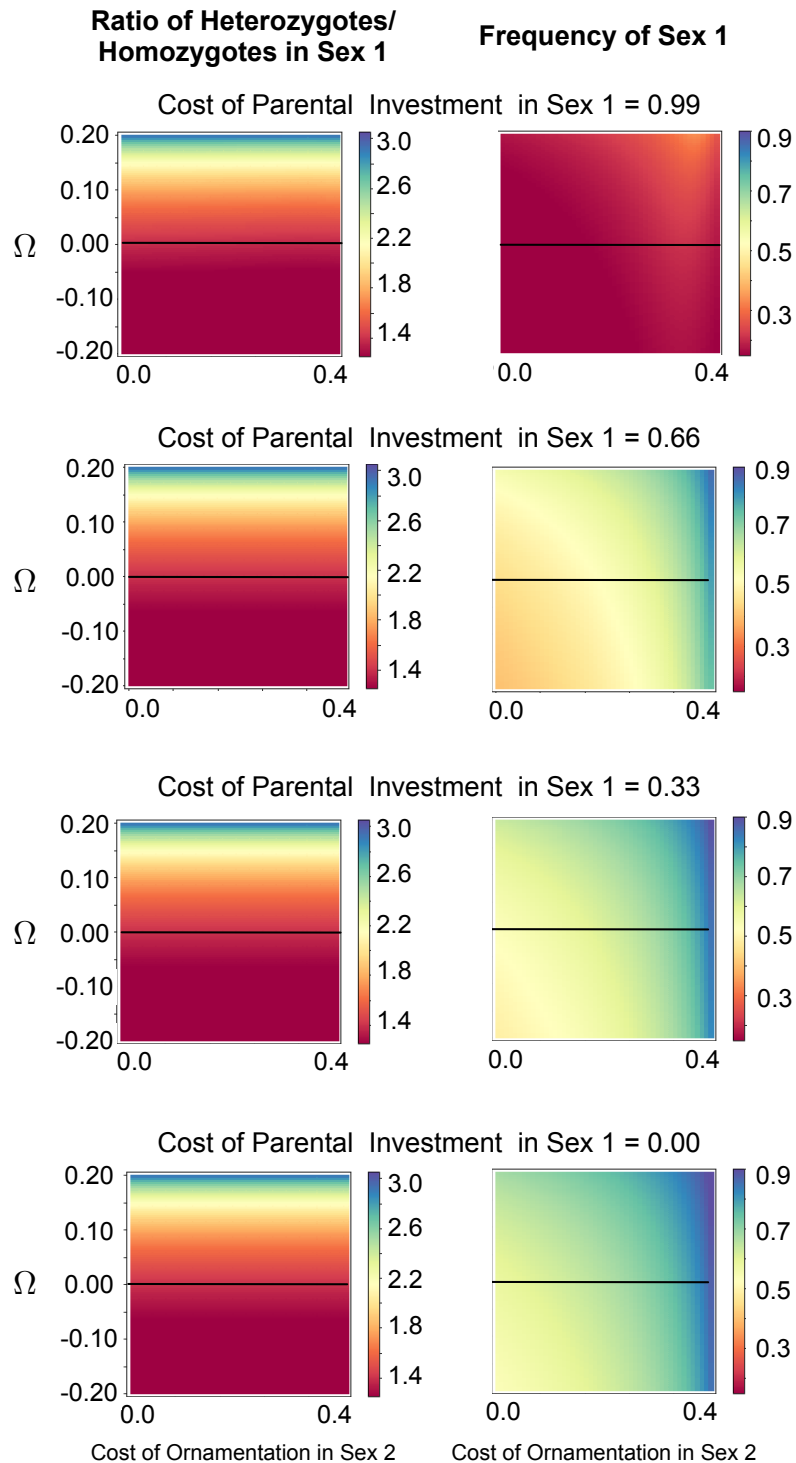

Figure S.3: Ratio of Heterozygotes: Homozygotes in Sex 1 and the frequency of Sex 2 for a full range of  $\Omega$ . The parameter  $\Omega$  is a measure of the sex difference in immune response through sexual conflict within the MHC as shown in Figure 2. in the main article. It represents the sex-specific fitness effect of Sex 1 relative to Sex 2. When  $\Omega = 0$ , there is no sex-specific difference in immune response. There is no effect of ornamentation and parental investment (PI) on the ratio of allele diversity. However,  $\Omega$  has an effect on this ratio. All factors: cost of PI, cost of ornamentation and  $\Omega$  have an effect on the frequency of the sexes. Though the effect of  $\Omega$  is not profound, the cost of ornamentation in Sex 2 and cost of PI in Sex 1 reduce their frequency, respectively.

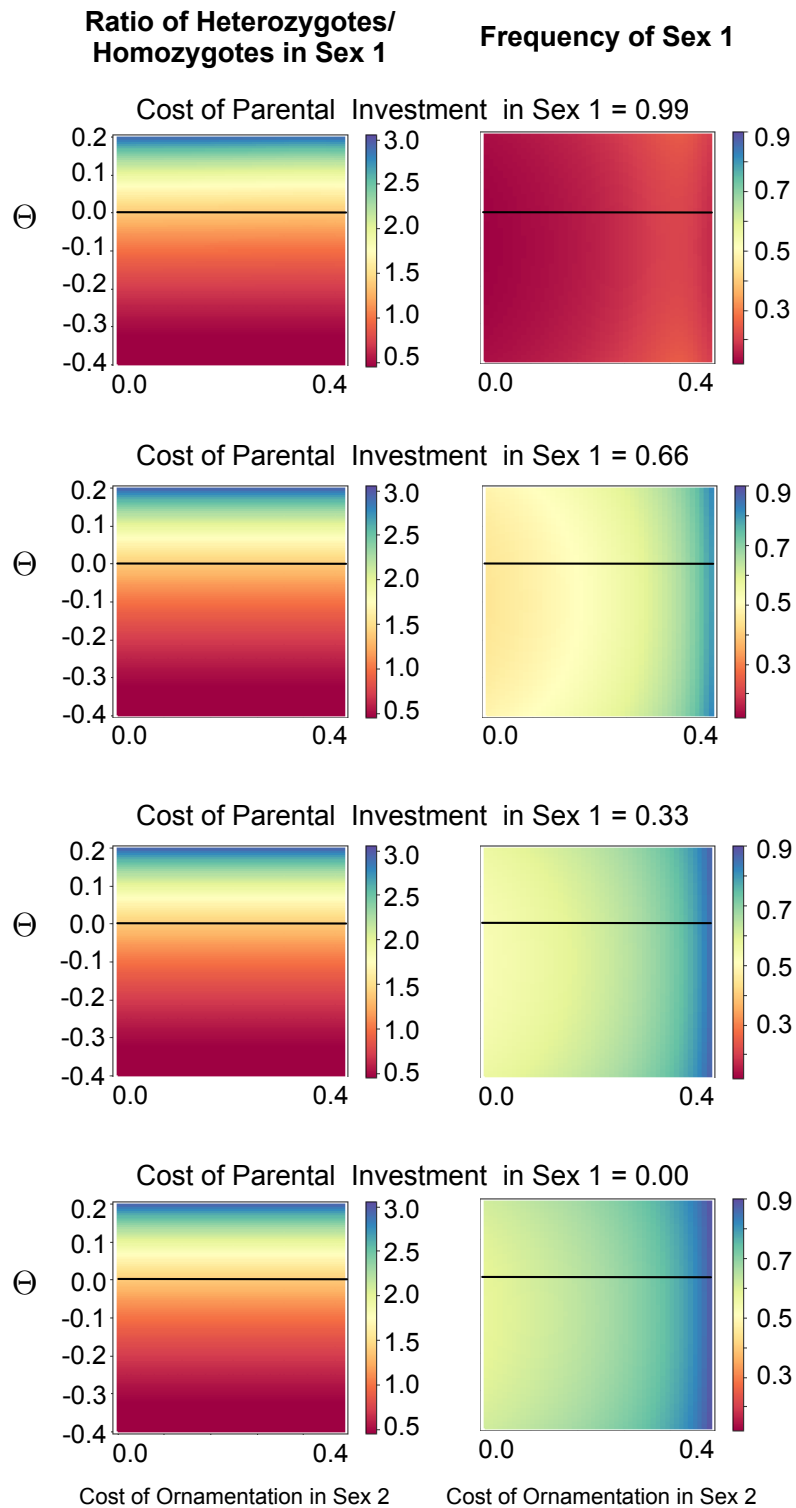

Figure S.4: Ratio of Heterozygotes: Homozygotes in Sex 1 and the frequency of Sex 2 for a full range of  $\Theta$ . The parameter  $\Theta$  is a measure of the sex difference in immune response through sexual conflict within the MHC as shown in Figure 2. in the main article. It represents the effect of allelic diversity on sex-specific fitness of Sex 1 relative to Sex 2. When  $\Theta = 0$ , there is so sex-specific difference in immune response. The parameter  $\Theta$  has an effect on the allele diversity ratio. But there is no effect of ornamentation and parental investment (PI) on this ratio. There is no effect of  $\Theta$  on the frequency of Sex 1. The cost of ornamentation in Sex 2 increases the frequency of Sex 1 while the cost of PI decreases its frequency.



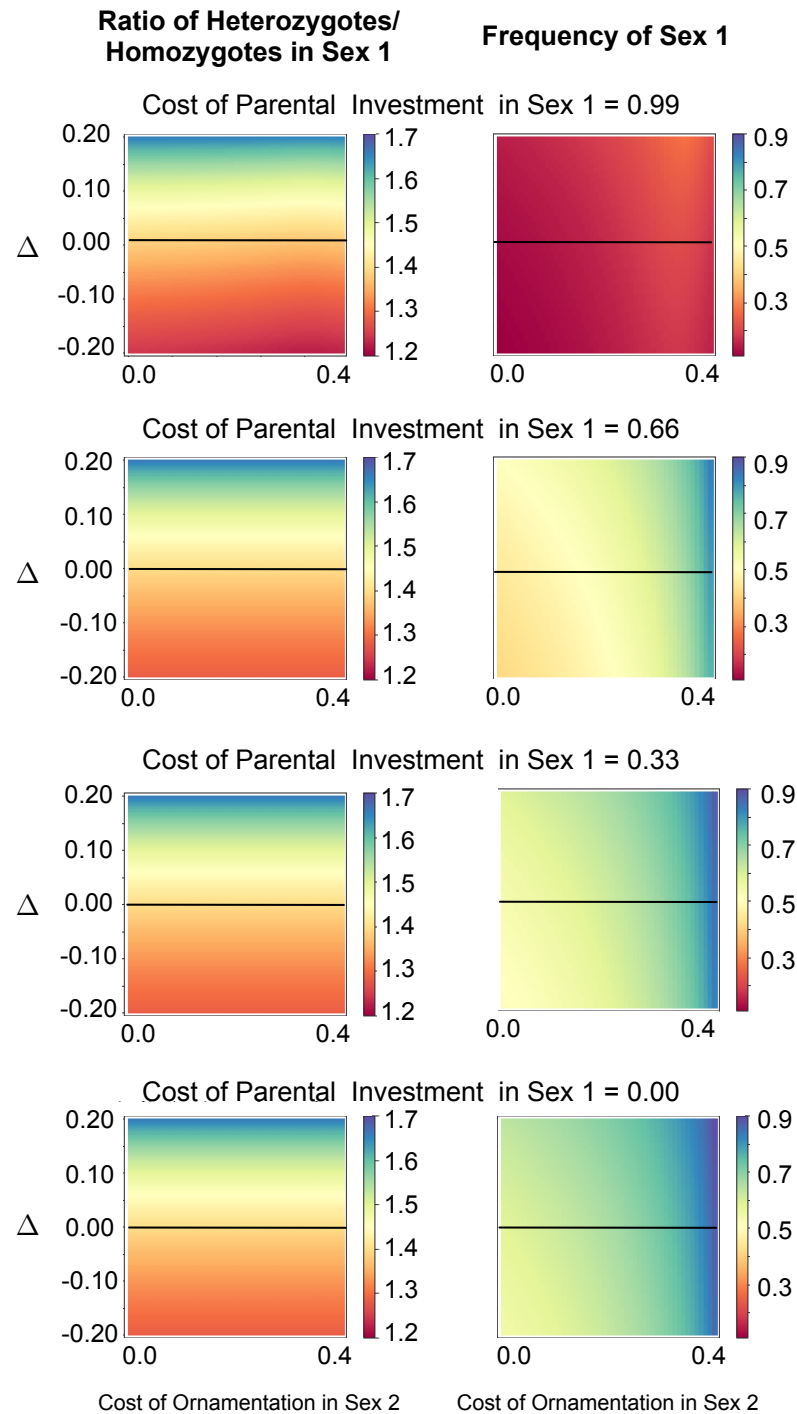

Figure S.5: Ratio of Heterozygotes: Homozygotes in Sex 1 and the frequency of Sex 2 for a full range of  $\Delta$ . The parameter  $\Delta$  is a measure of the sex difference in immune response through sexual conflict within the MHC as shown in Figure 2. in the main article. It represents the sex-specific fitness effect (that also includes the effect of diversity on sex-specific fitness) of Sex 1 relative to Sex 2. When  $\Delta = 0$ , there is so sex-specific difference in immune response. There is no effect of ornamentation and parental investment (PI) on the ratio of allele diversity. But  $\Delta$  has an effect on this ratio. As observed in the previous figure, here too, the cost of ornamentation in Sex 2 and cost of PI in Sex 1 reduce their frequency, respectively while the effect of  $\Delta$  is not as profound.

## 382 References

- 383 Alonzo, S. H., 2002. State-dependent habitat selection games between predators and prey: the  
384 importance of behavioural interactions and expected lifetime reproductive success. *Evolutionary*  
385 *Ecology Research* 4 (5), 759–778.
- 386 Alonzo, S. H., 2010. Social and coevolutionary feedbacks between mating and parental investment.  
387 *Trends in Ecology & Evolution* 25 (2), 99–108.
- 388 Andersson, M., Simmons, L. W., 2006. Sexual selection and mate choice. *Trends in ecology &*  
389 *evolution* 21 (6), 296–302.
- 390 Apanius, V., Penn, D., Slev, P., Ruff, L., Potts., W., 1997. The nature of selection on the major  
391 histocompatibility complex. *Critical Reviews in Immunology* 17, 179–224.
- 392 Austad, S. N., 2006. Why women live longer than men: sex differences in longevity. *Gender medicine*  
393 3 (2), 79–92.
- 394 Bateman, A., 1948. Intra-sexual selection in drosophila. *Heredity* 2 (3), 349–68.
- 395 Bell, G., 1978. The evolution of anisogamy. *Journal of Theoretical Biology* 73 (2), 247–270.
- 396 Berglund, A., Rosenqvist, G., 2003. Sex role reversal in pipefish. *Advances in the Study of Behavior*  
397 32, 131–168.
- 398 Berglund, A., Rosenqvist, G., Bernet, P., 1997. Ornamentation predicts reproductive success in  
399 female pipefish. *Behavioral Ecology and Sociobiology* 40 (3), 145–150.
- 400 Berglund, A., Rosenqvist, G., Svensson, I., 1986. Reversed sex roles and parental energy investment  
401 in zygotes of two pipefish (syngnathidae) species. *Marine Ecology Progress Series*, 209–215.
- 402 Bolnick, D. I., Doebeli, M., 2003. Sexual dimorphism and adaptive speciation: two sides of the same  
403 ecological coin. *Evolution* 57 (11), 2433–2449.
- 404 Carranza, J., Álvarez, F., Redondo, T., 1990. Territoriality as a mating strategy in red deer. *Animal*  
405 *Behaviour* 40 (1), 79–88.
- 406 Chandra, R. K., 1983. Nutrition, Immunity, and Infection - Present Knowledge and Future-Directions.  
407 *Lancet* 1 (8326), 688–691.
- 408 Chapman, T., Partridge, L., 1996. Female fitness in drosophila melanogaster: an interaction between  
409 the effect of nutrition and of encounter rate with males. *Proceedings of the Royal Society of*  
410 *London. Series B: Biological Sciences* 263 (1371), 755–759.
- 411 Chen, W., Gracia-Lázaro, C., Li, Z., Wang, L., Moreno, Y., 2017. Evolutionary dynamics of n-person  
412 hawk-dove games. *Scientific reports* 7 (1), 4800.
- 413 Cockburn, A., 2006. Prevalence of different modes of parental care in birds. *Proceedings of the Royal*  
414 *Society B: Biological Sciences* 273 (1592), 1375–1383.
- 415 Crow, J. F., Kimura, M., 1970. *An Introduction to Population Genetics Theory*. Harper and Row,  
416 New York.
- 417 Daly, M., 1978. The cost of mating. *The American Naturalist* 112 (986), 771–774.

- 418 De Lisle, S. P., 2019. Understanding the evolution of ecological sex differences: Integrating character  
419 displacement and the darwin-bateman paradigm. *Evolution Letters* 0 (0).
- 420 Doebeli, M., Ispolatov, Y., Simon, B., 2017. Towards a mechanistic foundation of evolutionary  
421 theory. *eLife* 6, e23804.
- 422 Eizaguirre, C., Yeates, S. E., Lenz, T. L., Kalbe, M., Milinski, M., 2009. Mhc-based mate choice  
423 combines good genes and maintenance of mhc polymorphism. *Molecular Ecology* 18 (15), 3316–  
424 3329.
- 425 Fleming, I. A., Hindar, K., MjÖlnerÖd, I. B., Jonsson, B., Balstad, T., Lamberg, A., 2000. Lifetime  
426 success and interactions of farm salmon invading a native population. *Proceedings of the Royal  
427 Society of London. Series B: Biological Sciences* 267 (1452), 1517–1523.
- 428 Forbes, M. R., 2007. On sex differences in optimal immunity. *Trends in ecology & evolution* 22 (3),  
429 111–113.
- 430 Freeman, S., Herron, J. C., 2007. *Evolutionary analysis*. No. QH 366.2. F73 2007. Pearson Prentice  
431 Hall Upper Saddle River, NJ.
- 432 Gokhale, C. S., Reeves, R. G., Reed, F. A., 2014. Dynamics of a combined medea-underdominant  
433 population transformation system. *BMC Evolutionary Biology* 14 (1), 98.
- 434 Gokhale, C. S., Traulsen, A., 2014. Evolutionary multiplayer games. *Dynamic Games and Applica-  
435 tions* 4, 468–488.
- 436 Gross, M. R., Sargent, R. C., 1985. The evolution of male and female parental care in fishes.  
437 *American Zoologist* 25 (3), 807–822.
- 438 Hagen, D., Gilbertson, L., 1973. Selective predation and the intensity of selection acting upon the  
439 lateral plates of threespine sticklebacks. *Heredity* 30 (3), 273.
- 440 Hayward, A., Gillooly, J. F., 2011. The cost of sex: quantifying energetic investment in gamete  
441 production by males and females. *PLoS One* 6 (1), e16557.
- 442 Hedrick, A. V., Temeles, E. J., 1989. The evolution of sexual dimorphism in animals: hypotheses  
443 and tests. *Trends in Ecology & Evolution* 4 (5), 136–138.
- 444 Henshaw, J. M., Fromhage, L., Jones, A. G., 2019. Sex roles and the evolution of parental care  
445 specialization. *Proceedings of the Royal Society B* 286 (1909), 20191312.
- 446 Hillgarth, N., Wingfield, J. C., 1997. Testosterone and immunosuppression in vertebrates: implica-  
447 tions for parasite-mediated sexual selection. In: *Parasites and pathogens*. Springer, pp. 143–155.
- 448 Hofbauer, J., Sigmund, K., 1998. *Evolutionary Games and Population Dynamics*. Cambridge Uni-  
449 versity Press, Cambridge, UK.
- 450 Kalbe, M., Eizaguirre, C., Dankert, I., Reusch, T. B. H., Sommerfeld, R. D., Wegner, K. M., Milin-  
451 ski, M., 2009. Lifetime reproductive success is maximized with optimal major histocompatibility  
452 complex diversity. *Proceedings of the Royal Society B* 276, 925–934.
- 453 Kelly, N., Alonzo, S., 2010. Does a trade-off between current reproductive success and survival affect  
454 the honesty of male signalling in species with male parental care? *Journal of evolutionary biology*  
455 23 (11), 2461–2473.

- 456 Kirkpatrick, M., 1982. Sexual selection and the evolution of female choice. *Evolution* 36 (1), 1–12.
- 457 Kokko, H., Jennions, M., 2003. It takes two to tango. *Trends in Ecology & Evolution* 18 (3),  
458 103–104.
- 459 Kokko, H., Jennions, M. D., 2008. Parental investment, sexual selection and sex ratios. *Journal of*  
460 *evolutionary biology* 21 (4), 919–948.
- 461 Kurtz, J., 2007. The correlation between immunocompetence and an ornament trait changes over  
462 lifetime in *panorpa vulgaris* scorpionflies. *Zoology* 110 (5), 336–343.
- 463 Liker, A., Freckleton, R. P., Remeš, V., Székely, T., 2015. Sex differences in parental care: Gametic  
464 investment, sexual selection, and social environment. *Evolution* 69 (11), 2862–2875.
- 465 Liker, A., Freckleton, R. P., Székely, T., 2013. The evolution of sex roles in birds is related to adult  
466 sex ratio. *Nature Communications* 4, 1587.
- 467 Lin, T., Zhang, D., Liu, X., Xiao, D., 2016. Parental care improves immunity in the seahorse  
468 (*hippocampus erectus*). *Fish & Shellfish Immunology* 58, 554–562.
- 469 Love, O. P., Salvante, K. G., Dale, J., Williams, T. D., 2008. Sex-specific variability in the immune  
470 system across life-history stages. *The American Naturalist* 172 (3), E99–E112.
- 471 Martin, T. E., 1992. Interaction of nest predation and food limitation in reproductive strategies. In:  
472 *Current ornithology*. Springer, pp. 163–197.
- 473 May, R. C., 2007. Gender, immunity and the regulation of longevity. *Bioessays* 29 (8), 795–802.
- 474 Maynard Smith, J., 1986. Evolutionary game theory. *Physica D: Nonlinear Phenomena* 22 (1), 43–49.
- 475 Milinski, M., 2006. The major histocompatibility complex, sexual selection, and mate choice. *Annual*  
476 *Review of Ecology, Evolution, and Systematics* 37, 159–186.
- 477 Mobley, K. B., Granroth-Wilding, H., Ellmen, M., Vähä, J.-P., Aykanat, T., Johnston, S. E., Orell,  
478 P., Erkinaro, J., Primmer, C. R., 2019. Home ground advantage: Local atlantic salmon have  
479 higher reproductive fitness than dispersers in the wild. *Science advances* 5 (2), eaav1112.
- 480 Moore, A. J., 1990. The evolution of sexual dimorphism by sexual selection: the separate effects of  
481 intrasexual selection and intersexual selection. *Evolution* 44 (2), 315–331.
- 482 Nowak, M. A., Tarczy-Hornoch, K., Austyn, J. M., 1992. The optimal number of major histocom-  
483 patibility complex molecules in an individual. *Proceedings of the National Academy of Sciences*  
484 *USA* 89 (22), 10896–10899.
- 485 Nunn, C. L., Lindenfors, P., Pursall, E. R., Rolff, J., 2008. On sexual dimorphism in immune function.  
486 *Philosophical Transactions of the Royal Society B: Biological Sciences* 364 (1513), 61–69.
- 487 Oertelt-Prigione, S., 2012. The influence of sex and gender on the immune response. *Autoimmunity*  
488 *reviews* 11 (6-7), A479–A485.
- 489 Otto, S. P., Day, T., 2007. *A Biologist's Guide to Mathematical Modeling in Ecology and Evolution*.  
490 Princeton Univ. Press, Princeton, NJ.
- 491 Perrone Jr, M., Zaret, T. M., 1979. Parental care patterns of fishes. *The American Naturalist* 113 (3),  
492 351–361.

- 493 Petrie, M., Tim, H., Carolyn, S., 1991. Peahens prefer peacocks with elaborate trains. *Animal*  
494 *Behaviour* 41 (2), 323–331.
- 495 Pipoly, I., Bókony, V., Kirkpatrick, M., Donald, P. F., Székely, T., Liker, A., 2015. The genetic  
496 sex-determination system predicts adult sex ratios in tetrapods. *Nature* 527 (7576), 91.
- 497 Pusey, A., Williams, J., Goodall, J., 1997. The influence of dominance rank on the reproductive  
498 success of female chimpanzees. *Science* 277 (5327), 828–831.
- 499 Roth, O., Scharsack, J., Keller, I., Reusch, T. B., 2011. Bateman's principle and immunity in a  
500 sex-role reversed pipefish. *Journal of evolutionary biology* 24 (7), 1410–1420.
- 501 Roved, J., 2019. MHC polymorphism in a songbird.
- 502 Roved, J., Hansson, B., Tarka, M., Hasselquist, D., Westerdahl, H., 2018. Evidence for sexual  
503 conflict over major histocompatibility complex diversity in a wild songbird. *Proceedings of the*  
504 *Royal Society B: Biological Sciences* 285 (1884), 20180841.
- 505 Roved, J., Westerdahl, H., Hasselquist, D., 2017. Sex differences in immune responses: hormonal  
506 effects, antagonistic selection, and evolutionary consequences. *Hormones and Behavior* 88, 95–  
507 105.
- 508 Schuster, P., Sigmund, K., 1983. Replicator dynamics. *Journal of Theoretical Biology* 100, 533–538.
- 509 Sigmund, K., Nowak, M. A., 1999. Evolutionary game theory. *Current Biology* 9 (14), R503–R505.
- 510 Smith, C., Wootton, R., 1999. Parental energy expenditure of the male three-spined stickleback.  
511 *Journal of Fish Biology* 54 (5), 1132–1136.
- 512 Stoehr, A. M., Kokko, H., 2006. Sexual dimorphism in immunocompetence: what does life-history  
513 theory predict? *Behavioral Ecology* 17 (5), 751–756.
- 514 Székely, T., Weissing, F. J., Komdeur, J., 2014. Adult sex ratio variation: implications for breeding  
515 system evolution. *Journal of evolutionary biology* 27 (8), 1500–1512.
- 516 Törnwall, J., Carey, A., Fox, R., Fox, H. S., 1999. Estrogen in autoimmunity: expression of estrogen  
517 receptors in thymic and autoimmune t cells. *The journal of gender-specific medicine: JGSM: the*  
518 *official journal of the Partnership for Women's Health at Columbia* 2 (5), 33–40.
- 519 Trivers, R., 1972. Parental investment and sexual selection. *Sexual Selection & the Descent of Man,*  
520 *Aldine de Gruyter, New York, 136–179.*
- 521 Trivers, R., 2002. *Natural selection and social theory: Selected papers of Robert Trivers.* Oxford  
522 University Press, USA.
- 523 Uekert, S. J., Akan, G., Evans, M. D., Li, Z., Roberg, K., Tisler, C., DaSilva, D., Anderson, E.,  
524 Gangnon, R., Allen, D. B., et al., 2006. Sex-related differences in immune development and  
525 the expression of atopy in early childhood. *Journal of allergy and clinical immunology* 118 (6),  
526 1375–1381.
- 527 Vasconcelos, P., Rueffler, C., in press. How does joint evolution of consumer traits affect resource  
528 specialization? *The American Naturalist*.

- 529 Venkateswaran, V. R., Gokhale, C. S., 2019. Evolutionary dynamics of complex multiple games.  
530 Proceedings of the Royal Society B: Biological Sciences 286 (1905), 20190900.
- 531 Vincent, A. C., Sadler, L. M., 1995. Faithful pair bonds in wild seahorses, *hippocampus whitei*.  
532 Animal behaviour 50 (6), 1557–1569.
- 533 Wade, M. J., Shuster, S. M., 2002. The evolution of parental care in the context of sexual selection:  
534 a critical reassessment of parental investment theory. The American Naturalist 160 (3), 285–292.
- 535 Whitacre, C. C., 2001. Sex differences in autoimmune disease. Nature immunology 2 (9), 777.
- 536 Woelfing, B., Traulsen, A., Milinski, M., Boehm, T., 2009. Does intra-individual major histocom-  
537 patibility complex diversity keep a golden mean? Philosophical Transactions of the Royal Society  
538 B 364, 117–128.
- 539 Wong, B. B., Candolin, U., 2005. How is female mate choice affected by male competition? Bio-  
540 logical Reviews 80 (4), 559–571.
- 541 Zahavi, A., 1977. The cost of honesty (further remarks on the handicap principle). Journal of  
542 theoretical Biology 67 (3), 603–605.
